# 1 Regenerating axolotl retinas regrow diverse cell types with 2 modulation by Notch signaling and reconnect to the brain

3 **Authors:** Anastasia S. Yandulskaya<sup>1</sup>, Melissa N. Miller<sup>1</sup>, Ronak Ansari<sup>2</sup>, Rebecca  
4 L. Carrier<sup>2</sup>, James R. Monaghan<sup>1\*</sup>

5 <sup>1</sup> Biology Department, Northeastern University, Boston, Massachusetts, USA

6 <sup>2</sup> Department of Chemical Engineering, Northeastern University, Boston,  
7 Massachusetts, USA

8 **Correspondence:** \*James R. Monaghan, [j.monaghan@northeastern.edu](mailto:j.monaghan@northeastern.edu)

## 9 **Summary:**

10 We demonstrate that adult Mexican axolotl salamanders regenerate retinas after a  
11 retinectomy. We also show some cellular and molecular mechanisms that drive axolotl  
12 retinal regeneration.

13 **Keywords:** axolotl, retina, retinal regeneration, retinal pigment epithelium

## 14 **Abstract**

15 Some species successfully repair retinal injuries in contrast to non-regenerative  
16 mammalian retina. We show here that the Mexican axolotl salamander regrows its  
17 excised retina even in adulthood. During early regeneration, cell proliferation occurred in  
18 the retinal pigment epithelium (RPE). All dividing cells expressed *Vimentin*, and some  
19 also expressed Müller glia and neural progenitor cell marker *Glast (Slc1a3)*, suggesting  
20 that regeneration is driven by RPE-derived retinal progenitor cells. Bulk RNA sequencing  
21 showed that genes associated with the extracellular matrix and angiogenesis were  
22 upregulated in early-to-mid retinal regeneration. The fully regenerated retina re-  
23 established nerve projections to the brain and contained all the original retinal cell types,  
24 including Müller glia. Regeneration of cellular diversity may be modulated by Notch  
25 signaling, as inhibiting Notch signaling in early regeneration promoted production of rod  
26 photoreceptors. Our study highlights the axolotl salamander as an advantageous model  
27 of adult tetrapod retinal regeneration and provides insights into its mechanisms.

## 28 Introduction

29 Retinas are susceptible to degeneration that impairs eyesight for life. Humans and  
30 other mammals cannot repair this damage, but some vertebrate species regenerate  
31 injured retinas. Zebrafish and newt salamanders (Gemberling et al., 2013; Mitashov,  
32 1996) are well-established models of retinal regeneration, but they regrow injured retinas  
33 differently. Müller glia repair retinal lesions in zebrafish (Thummel et al., 2008), and retinal  
34 pigment epithelium (RPE) regenerates the retina after a retinectomy in Japanese fire-  
35 bellied newts (Islam et al., 2014; Thummel et al., 2008). Investigating how other  
36 regenerative species regrow their retinas will advance the existing understanding of the  
37 mechanisms of retinal regeneration.

38 The Mexican axolotl (*Ambystoma mexicanum*) presents an intriguing possibility for  
39 investigating retinal regeneration. This salamander is a popular model of complex tissue  
40 regeneration, most notably of limbs and the spinal cord (Simon & Tanaka, 2013; Tazaki  
41 et al., 2017). It can also regenerate portions of ovaries, lungs, the liver, and the brain even  
42 in adulthood (Erlor et al., 2017; Jensen et al., 2021; Maden et al., 2013; Ohashi et al.,  
43 2021). However, the regenerative abilities of axolotl eye tissues at different life stages are  
44 either limited or understudied. Axolotl larvae only regenerate lenses for up to two weeks  
45 after hatching, after which the ability is lost (Suetsugu-Maki et al., 2012). Juvenile axolotls  
46 (4 months) can regenerate removed retinas (Svistunov & Mitashov, 1983), but it remains  
47 unknown whether axolotl retinal regeneration persists into adulthood (approximately 1  
48 year of age) or what mechanisms govern it.

49 We show here that adult paedomorphic axolotls regrow their retinas after a  
50 retinectomy, regenerating diverse retinal cell types and re-establishing connections with  
51 the brain. Using bulk RNA sequencing, we uncovered genes that are expressed  
52 differentially in retinal regeneration. We also show that the Notch signaling pathway may  
53 be an important regulator of axolotl retinal regeneration. Our findings establish the axolotl  
54 as a model of tetrapod retinal regeneration and provide insights into its molecular  
55 mechanisms, which may pave the way towards translating this fascinating ability into  
56 treating retinal diseases.

57

58 Abbreviations: **RPE**, retinal pigment epithelium; **ONL**, outer nuclear layer; **INL**,  
59 inner nuclear layer; **RGC**, retinal ganglion cells; **OPL**, outer plexiform layer; **IPL**, inner  
60 plexiform layer; CTB, cholera toxin subunit B; **GFP**, green fluorescent protein; **ECM**, the  
61 extracellular matrix; **IGF**, insulin-like growth factor; **TGF- $\beta$** , transforming growth factor  
62 beta.

63

## 64 **Methods**

### 65 **Animal care**

66 Animals were bred in our laboratory or purchased from the Ambystoma Genetic  
67 Stock Center (Lexington, KY). The animals were housed as previously described (Farkas,  
68 2015), on a 12:12 light:dark schedule and fed soft salmon pellets. All procedures were  
69 approved by Northeastern University Institutional Animal Care and Use Committee. Male  
70 and female adult axolotls were used, the term “adult” referring to paedomorphic axolotls  
71 who had reached sexual maturity.

### 72 **Surgeries and tissue collection**

73 Animals were anesthetized in 0.01% benzocaine prior to all procedures. For eye  
74 collection, animals were euthanized in 0.05% benzocaine followed by decapitation.

75 Cell proliferation: the animals were weighed and injected intraperitoneally with 8.0  
76 ng EdU/g of animal weight in PBS, using 0.33 x 12.7 mm insulin syringes (Exel Int®).  
77 The animals were returned to housing water for 3 hours and then sacrificed for eye  
78 collection.

79 Retinectomies: corneas of the left eyes were punctured with a straight surgical  
80 needle and cut halfway around the lens with surgical scissors. The lenses were removed  
81 with forceps and the retinas were removed by gently flushing the anterior eye cavities  
82 with PBS using a p20 pipette. The animals were returned to housing water in free-

83 standing plastic containers. The right eyes were left uninjured as internal controls. Every  
84 retinectomy also involved a lentectomy.

85 Nerve tracing: we retinectomized 5 adult animals (13-17 cm in total length) and  
86 allowed them to regenerate for 367 days. We then anesthetized the animals and cut small  
87 V-shaped skin and cartilage flaps in the skulls between the eyes, partially exposing the  
88 brain, and labeled the brains with a retrograde nerve tracer cholera toxin subunit B  
89 conjugated with Alexa Fluor™ 594 dye (0.5 mg/ml, with approximately 10 µl of final  
90 solution per animal). The cartilage flaps were replaced, and the animals were kept under  
91 wet lint-free tissues for about 15 minutes with their heads raised to prevent the nerve  
92 tracer from leaking out, and then returned to their tanks. The procedure was repeated 3  
93 days later, but the tracer was injected in the existing skull openings without conducting  
94 another surgery. The animals were sacrificed at 377 dpi (days post injury), 10 days after  
95 the first tracer injection.

96 DAPT treatment: we soaked small pieces (>0.5mm in diameter) of cotton balls  
97 (Thermo Fisher) in 100 mM Notch pathway inhibitor DAPT (Tocris) or its vehicle dimethyl  
98 sulfoxide (DMSO; Sigma). We retinectomized the left eyes of 12 male and female adult  
99 axolotls (14.5-18 cm in total length). At 15 dpi, we cut small incisions in the corneas of  
100 retinectomized eyes and inserted the cotton ball pieces in the intraocular space, as  
101 described previously (Nakamura & Chiba, 2007). The treatments were assigned to the  
102 animals randomly. The animals were then returned to their housing containers until  
103 dpi when they were sacrificed and the left eyes were collected for analysis.

104 RNA sequencing: the removed (uninjured) retinas were placed in empty 1.5 ml  
105 tubes, flash frozen in liquid nitrogen, and stored at -80°C. The animals were returned to  
106 their housing containers for 27 days. To collect the regenerating retinas, the animals were  
107 sacrificed, the injured eyes were enucleated, and the anterior part of the eyes was  
108 carefully trimmed away with surgical scissors. The tissue on the posterior internal side of  
109 the exposed eye cups was collected with forceps, placed in 1.5 ml tubes, flash frozen in  
110 liquid nitrogen, and stored at -80°C. Both uninjured and regenerating conditions had three

111 biological replicates, with each replicate consisting of four animals, for a total of 12  
112 animals.

### 113 **Immunohistochemistry and EdU detection**

114 Collected samples were fixed overnight in 4% paraformaldehyde at 4°C, washed  
115 twice for five minutes with phosphate-buffered saline (PBS; Fisher Scientific), and  
116 cryoprotected in 30% solution of sucrose in PBS at room temperature until the tissue  
117 sank. The samples were then embedded in Optimal Cutting Temperature embedding  
118 medium (Fisher Scientific), frozen at -80°C and stored there until use. Tissues were  
119 sectioned to 12 µm, washed with deionized water for 5 minutes, washed with PBS for 5  
120 minutes, blocked in 1.5% goat serum for 30 minutes, and incubated in primary antibodies  
121 diluted in 1.5% goat serum overnight at 4°C. The sections were then washed with PBS  
122 for 5 minutes and incubated in a secondary antibody dilution (1:400 in PBS) for 30  
123 minutes.

124 Primary antibodies used: rhodopsin (1:400, rabbit, #8710, Cell Signaling  
125 Technologies), β-III-tubulin (1:500, mouse, MA1-118, ThermoFisher Scientific).  
126 Secondary antibodies used: Alexa Fluor™ 594 goat anti-rabbit IgG (1:400, 1851471,  
127 Invitrogen), Alexa Fluor™ 594 goat anti-mouse IgG (1:400, 1851471, Invitrogen).

128 To detect EdU-positive cells, sections were washed with water and PBS, incubated  
129 in Click reaction cocktail (1X tris-buffered saline diluted from stock (Alfa Aesar), 100 mM  
130 sodium ascorbate (Acros Organics) in 1X TBS, 4mM CuSO<sub>4</sub> (Acros Organics) in 1X TBS,  
131 and 5 µM AF 594 picolyl azide (Click Chemistry Tools)) for 30 minutes in the dark, washed  
132 for five minutes each with PBS, DAPI, PBS, and water, and mounted with 80% glycerol  
133 or Slow-fade™ (Invitrogen).

### 134 **Version 3 fluorescent in situ hybridization chain reaction (V3 HCR FISH)**

135 We have developed DNA probe sequences for detecting the following cell type  
136 markers: *Rhodopsin* (rod photoreceptors) (Osakada et al., 2008), *Rpe65* (the RPE) (Al-  
137 Hussaini et al., 2008), *Glast* (also called *Slc1a3*; Müller glia) (Quintero et al., 2016), *Pkca*

138 (bipolar cells) (Haverkamp et al., 2003), *Lhx1* (horizontal cells) (Poche et al., 2007), and  
139 *Glyt1* (amacrine cells) (Nakhai et al., 2007). Probes were also generated for *Vimentin*,  
140 *Notch1*, *Jag1*, *Hes1*, and *Hes5*. Probes were designed as described previously (Jensen  
141 et al., 2021), using Oligominer (Beliveau et al., 2018) and Bowtie2 (Langmead &  
142 Salzberg, 2012) against the 6.0-DD axolotl genome (Nowoshilow et al., 2018; Smith et  
143 al., 2019) (<http://probegenerator.herokuapp.com/>).

144 Collected samples were embedded in OCT, immediately frozen at -80°C without  
145 fixation to limit autofluorescence in the RPE and photoreceptor layers, and stored until  
146 use. The samples were sectioned on Superfrost Plus slides at 12 µm thickness on a  
147 cryostat (Leica), briefly air-dried at room temperature, and post-fixed with 4%  
148 paraformaldehyde for 15 minutes at room temperature. The sections were then washed  
149 with PBS (Invitrogen) and dehydrated in 100% ethanol for 15 minutes. Any unused slides  
150 were at this point stored in 100% ethanol in sealed LockMailer microscope slides jars at  
151 -80°C.

152 The remaining sections were washed 3x10 minutes with 8% sodium dodecyl  
153 sulfate (Fisher Scientific) to further reduce tissue autofluorescence, washed with PBS  
154 (Invitrogen), pre-hybridized with pre-warmed hybridization buffer (Molecular Instruments)  
155 at 37°C for 15 minutes, and incubated with probes (5 nM in pre-warmed hybridization  
156 buffer) at 37°C overnight under parafilm in humidified chambers.

157 On the next day, the sections were washed with pre-warmed formamide probe  
158 wash (Molecular Instruments) 3x15 minutes at 37°C and washed with 5X saline sodium  
159 citrate buffer with 0.1% Tween (SSCT) 2x10 minutes at 37°C. Concurrently, hairpins were  
160 prepared by aliquoting H1 and H2 hairpins (3 µM; Molecular Instruments) into separate  
161 PCR tubes, heating the aliquots at 95°C for 90 seconds in a thermal cycler (Bio-Rad),  
162 and cooling them for at least 30 minutes at room temperature in the dark (i.e. in a drawer).  
163 The hairpin solution was prepared in the concentration of 1:50, adding 48 µl of  
164 amplification buffer (Molecular Instruments) to each pair of cooled 1 µl H1 and H2 hairpins  
165 (2 µl of hairpins in total). If several sets of hairpins were used, the volume of the  
166 amplification buffer was decreased to maintain the 1:50 dilution ratio. The sections were

167 washed with the amplification buffer for 10 minutes at room temperature and incubated  
168 in the hairpin solution under parafilm at room temperature for at least 3 hours or  
169 overnight. The sections were then washed with 5X SSCT 3x15 minutes at room  
170 temperature, stained with DAPI nuclear stain, washed with PBS and DEPC water, and  
171 mounted in Slow-fade™ (Invitrogen) with 24x50-1.5 microscope cover glass (Fisher  
172 Scientific).

173 For multi-round FISH, slides were imaged and then submerged in DEPC water in  
174 LockMailers jars to float off coverslips. The sections were treated with DNase (2000  
175 units/ml) for at least 1 hour at room temperature to wipe away the probes, washed with  
176 60% formamide probe wash for 30 minutes at room temperature, washed with SSCT 2x10  
177 minutes, pre-hybridized, and incubated with new probes overnight at 37°C. The  
178 remainder of the staining protocol was followed on the next day.

179 To preserve RNA in the tissue, RNase-away spray was used throughout the  
180 procedure and all solutions were prepared in deionized diethylpyrocarbonate (DEPC)-  
181 treated and autoclaved water. Fresh tissue sections were preferentially used because  
182 RNA integrity in sectioned samples can deteriorate during storage. If HCR FISH was  
183 combined with EdU detection, the Click reaction was carried out first.

## 184 **Bulk RNA sequencing and analysis**

185 RNA isolation and next generation sequencing were performed by Genewiz®  
186 (South Plainfield, NJ) with an Illumina® HiSeq® sequencing system. The sequencing  
187 parameters were 38 million 150 base pair reads with paired ends. The resulting data  
188 was analyzed for differential gene expression and gene ontology.

189 Differential expression analysis was performed on the Discovery research  
190 computing cluster. Raw reads were quality trimmed with Trimmomatic v0.38 (Bolger et  
191 al., 2014) and checked with FastQC v0.11.8 (Andrews, 2010). The paired reads were  
192 quasi-mapped to the V47 axolotl transcriptome (Nowoshilow & Tanaka, 2020) and  
193 quantified at gene level using salmon v0.13.1 (Patro et al., 2017) by the Trinity v2.8.5  
194 (Grabherr et al., 2011) script "align\_and\_estimate\_abundance.pl". The Trinity package



195 script “abundance\_estimates\_to\_matrix.pl” was used to generate raw counts and TMM-  
196 normalized expression matrices. The replicate quality for each group was checked with  
197 the Trinity “PtR” script. Differential expression analysis was performed using the  
198 “run\_DE\_analysis.pl” script with the DESeq2 v1.34.0 (Love et al., 2014) method and  
199 default parameters. Differential expression results were filtered for  $\text{padj} < 0.001$  and  $\log_2$   
200 fold change  $> 2$  or  $\log_2$  fold change  $< -2$  to represent genes that were significantly up- or  
201 down-regulated in regeneration, respectively. These files were then used in Gene  
202 Ontology (GO) analysis to find enriched and depleted GO terms.

203 GO analysis was performed as follows: Trinotate v3.2.2 (Bryant et al., 2017) was  
204 used to generate an annotation report containing top BLAST (Altschul et al., 1990) hits  
205 and GO (Ashburner et al., 2000; Gene Ontology, 2021; Mi et al., 2019) assignments from  
206 UniProt (UniProt, 2021). GO annotations were analyzed using GOseq v1.46.0 (Young et  
207 al., 2010) through the Trinity script “run\_GOseq.pl”. The Trinity script  
208 “analyze\_diff\_expr.pl” was run using the GO annotations file to analyze differentially  
209 expressed genes for enriched and depleted GO categories in up- and down-regulated  
210 genes. The top 25 enriched GO terms in each group were plotted with ggplot2 (Wickham,  
211 2016) in RStudio (RStudio Team, 2020).

## 212 **Image quantification and statistical analysis**

213 Images were taken on a Leica DM2500 microscope, a Zeiss LSM 800 confocal  
214 microscope, or a Zeiss LSM 880 confocal microscope at Northeastern University  
215 Institute for Chemical Imaging of Living Systems (CILS). Confocal images were z-stacks  
216 and imaging parameters were the same for all the images within an experiment.

217 Cell types were quantified in FIJI, using the cell counter plugin. In the 377 dpi  
218 experiment, cells of each type were counted within their respective nuclear layer (INL  
219 for *Lhx*, *Pkca*, and *Glyt1*; ONL for *Rhodopsin*; GCL, INL, and ONL for *Glast*; RPE for  
220 *Rpe65*) and normalized to the area of DAPI in those layers. Retinal thickness was  
221 measured using the “length” tool, with two measurements per each retinal section.

222 The data were analyzed with either Student’s two-tailed t-test in Excel or with  
223 ANOVA and post-hoc Tukey’s test in JMP 21 statistical software. We used  $p=0.05$  as



224 the significance threshold. Graphs were created using JMP 21. Images were processed  
225 in FIJI to improve brightness and contrast, and figures were assembled in Adobe  
226 Illustrator 2021.

227

## 228 Results

### 229 **Characterization of the axolotl eye and its retinectomy**

230 We first examined the morphology of the axolotl eye and retina. The axolotl retina  
231 follows the conserved retinal structure across vertebrates, containing three nuclear layers  
232 and two plexiform layers. The outer and inner nuclear layers in the axolotl retina are very  
233 close to each other, so we distinguished them by labeling the outer plexiform layer with a  
234 nerve marker  $\beta$ -III-tubulin (BTUBB) (Fig. 1A). Within the eye, the retina can be detected  
235 through its expression of rhodopsin (RHO), a gene expressed by rod photoreceptors (Fig.  
236 1B).

237 There are three proliferative niches in the homeostatic axolotl retina. Dividing  
238 EdU+ cells are found in the ciliary marginal zone (CMZ) and the retinal pigment epithelial  
239 layer (RPE), with occasional dividing cells in the inner nuclear layer (Fig. 1C). These three  
240 proliferative niches correspond to the three possible pools of retinal progenitor cells: the  
241 CMZ, the RPE, and Müller glia. They are affected differently by a retinectomy. Compared  
242 to an uninjured eye (Fig. 1D), a retinectomized eye lacks the lens and the retina. The  
243 retina, where Müller glia reside, is removed along with the CMZ, although parts of *ora*  
244 *serrata* may remain in the retinal margin (Fig. 1E). The RPE layer may be damaged but  
245 is not removed, and it retains dividing cells (Fig. 1E-F). Therefore, the retinectomy is a  
246 reliable injury method for the axolotl retina. Retinal regeneration can be assessed using  
247 the RHO marker for rod photoreceptors and the BTUBB marker of axons.

248

## 249 **Adult axolotls regenerate their retinas after a retinectomy**

250 We retinectomized the left eyes of 20 adult axolotls and allowed them to  
251 regenerate for 15, 35, 49, 65, or 90 days (n=4). We first observed the return of retinal  
252 neural layers expressing BTUBB at 49 dpi in one animal out of four (Fig. 2A). By 65 dpi  
253 and 90 dpi, the regenerating retinas had reformed the characteristic laminated  
254 morphology and distinct nerve layers. Two animals out of four had successfully  
255 regenerated their retinas at those time points. The photoreceptor layers (PL), which do  
256 not express BTUBB but were visible because of their high autofluorescence, reappeared  
257 at 65 dpi. At 90 dpi BTUBB expression was similarly present in the outer plexiform layer  
258 (OPL) and inner plexiform layer (IPL) in the regenerated and the uninjured contralateral  
259 retinas; the photoreceptor and RPE layers are autofluorescent. The pigment of the RPE  
260 layer had also regenerated (Fig. 2B). The lenses never regenerated.

261 We then assessed cellular proliferation patterns during regeneration (Fig. 2C). One  
262 animal was excluded from the 15 dpi group because its EdU injection had failed. The  
263 proportion of EdU+ dividing cells peaked at 15 and 35 dpi. It was not different between  
264 these two timepoints ( $p=0.99$ ). Proliferation in 15 dpi contralateral eyes was not different  
265 from contralateral eyes at later time points ( $p>0.7$ ), but it was not different from either 15  
266 dpi regenerating eyes ( $p=0.06$ ) or 35 dpi regenerating eyes ( $p=0.29$ ), which may imply a  
267 modest increase in cellular proliferation in the contralateral eyes at 15 dpi. After 35 days,  
268 the numbers of dividing cells decreased and were similar in injured and uninjured eyes  
269 for the remainder of the regeneration period (Fig. 2C'). The rate of cellular proliferation  
270 was highest at 15 dpi and 35 dpi. The regenerating eyes at 15 dpi and 35 dpi had a  
271 significantly higher proliferation rate than both contralateral and regenerating eyes at 49  
272 dpi, 65 dpi, and 90 dpi ( $p<0.01$ ), as well as contralateral eyes at 35 dpi ( $p=0.02$ ).  
273 Proliferation rate was also not different between contralateral and regenerating eyes  
274 during later stages of regeneration, at 49 dpi, 65 dpi, and 90 dpi ( $p>0.99$ ). In regenerating  
275 adult axolotl retina, cells divided at the highest rate at 15 dpi and 35 dpi, afterwards  
276 decreasing to contralateral uninjured levels. Meanwhile, the contralateral uninjured eye  
277 had a small proliferative spike at 15 dpi.

278 To understand what cell types were dividing at 15 dpi in regenerating eyes, we  
279 used HCR FISH to identify EdU+ cells expressing *Glast* (Müller glia marker) and *Rpe65*  
280 (RPE marker) in four adult axolotls (Fig. 2D). We also looked for cells positive for *Vim*,  
281 which is expressed in Müller glia, neural progenitor cells, and, under some conditions,  
282 RPE cells (Guidry et al., 2002). Most dividing EdU+ cells did not express either *Rpe65*  
283 or *Glast*, but all expressed *Vim*. 33.3% of dividing cells expressed *Glast*, although they  
284 lacked the characteristic elongated morphology of Müller glia. Only 1.3% of dividing cells  
285 contained *Rpe65* transcripts, although the presence of black retinal pigment was still  
286 substantial in the regenerating retina and co-localized with dividing cells (Fig. 2D). *Glast*  
287 and *Rpe65* were never co-expressed. Significantly more cells expressed *Glast* than  
288 *Rpe65* ( $p=0.012$ ) (Fig. 2D'). All dividing *Glast+* and *Rpe65+* cells also expressed *Vim*, so  
289 we did not examine statistical differences between the expression of *Vim* and the two  
290 other genes.

291

## 292 **Regenerated retinas contain diverse cell types and re-establish** 293 **connections to the brain**

294 We compared the cellular make-up of regenerated and contralateral uninjured  
295 axolotl retinas at 377 dpi. We identified the following cell types: rods (*Rho*), bipolar cells  
296 (*Lhx1*), horizontal cells (*Pkca*), amacrine cells (*Glyt1*), RPE cells (*Rpe65*), and Müller glia  
297 (*Glast*). We then compared the numbers of those cell types in regenerated and  
298 contralateral retinas. The numbers of rods ( $p=0.44$ ), RPE cells ( $p=0.13$ ), and bipolar cells  
299 ( $p=0.61$ ) were similar in both uninjured and regenerated retinas (Fig. 3A-C'). However,  
300 regenerated retinas contained fewer horizontal ( $p=0.013$ ) and amacrine cells ( $p=0.009$ )  
301 and more Müller glia ( $p=0.013$ ) (Fig. 3D-F'). This experiment suggests that the  
302 regenerated axolotl retina regrows the same cell types, some of which are regenerated  
303 in different proportions.

304 We also investigated whether the new retinas had regenerated projections to the  
305 brain through the optic nerve. Ten days prior to eye collection, we had injected a  
306 retrograde fluorescent nerve tracer cholera toxin subunit B (CTB) that travels from the

307 brain to the retina. All 5 retinectomized eyes had successfully regenerated retinas, and  
308 both regenerated and contralateral retinas contained CTB in the RGC layer (Fig. 3G-H).  
309 The CTB fluorescence was quantified at 20x magnification (Fig. 3G, I), but it is better  
310 visible at 40x magnification (Fig. 3H). The proportion of RGCs containing CTB was similar  
311 between contralateral and regenerated retinas ( $p=0.89$ ) (Fig. 3I), suggesting that  
312 regenerated axolotl retinas had successfully restored nerve projections from the retina to  
313 the brain. Interestingly, regenerated retinas were thinner than the contralateral ones  
314 ( $p=0.038$ ) (Fig. 3H). Importantly, the HCR FISH protocol quenches the CTB fluorescence  
315 (Fig. 3K), and therefore CTB and HCR FISH fluorescence was not present in the retinas  
316 at the same time.

317

### 318 **Bulk RNA sequencing of uninjured and regenerating retinas**

319 We conducted bulk RNA sequencing on uninjured and regenerating (27 dpi)  
320 retinas, derived from the same 12 adult axolotls, at early-to-mid stages of regeneration  
321 when cellular proliferation is still high (Fig. 2C). Both conditions had three biological  
322 replicates, each containing tissue pooled from four animals. The pooling was matched  
323 between uninjured and regenerating samples (Fig. 4A).

324 Genes were identified as differentially expressed if the absolute value of  $\log_2$ fold  
325 change was greater than 2. We identified enriched gene ontology (GO) terms in the  
326 categories of biological processes (BP), cellular components (CC), and molecular  
327 functions (MF). We then identified GO terms that were upregulated and downregulated in  
328 regenerating retinal samples. The plots include the top 25 enriched GO terms (Fig. 4).

329 We identified the GO terms that were associated with genes upregulated in  
330 regenerating retinal samples. They were predominantly associated with the extracellular  
331 matrix (ECM) (Fig. 4B), such as “extracellular region,” “extracellular matrix,” “collagen-  
332 containing extracellular matrix,” “cell-matrix,” “adhesion,” “basement membrane,” “integrin  
333 binding,” “and “collagen binding,” highlighting the importance of the extracellular matrix in  
334 regeneration.

335 Most ECM-related GO terms belonged to the “cellular component” category. To  
336 ensure that it did not obscure other gene categories, we plotted the top categories for  
337 “biological processes” and “molecular processes” only (Fig. 4C), which revealed  
338 additional GO terms that were associated with the genes upregulated in regenerating  
339 retinal samples. Vascularization of the regenerating retina was represented by GO terms  
340 “angiogenesis,” “vasculogenesis,” “positive regulation of angiogenesis,” and “heparin  
341 binding.” Signaling pathways were represented by GO terms “insulin-like growth factor  
342 binding” (IGF) and “transforming growth factor beta binding” (TGF- $\beta$ ). Interestingly, GO  
343 terms “ossification” and “skeletal system development” were also present, even though  
344 there are no bones in the retina, possibly implying that bone morphogenesis and retinal  
345 tissue growth employ similar molecular mechanisms. GO term “calcium binding” was also  
346 present, which may mean that calcium activity regulates regeneration of neural tissue.  
347 Finally, this analysis revealed the GO term “fibronectin binding,” which is associated with  
348 the extracellular matrix.

349 We then identified GO terms associated with genes downregulated in regeneration  
350 (Fig. 4D). They largely reflected neural activity, such as “synapse,” “regulation of  
351 membrane potential,” “chemical synaptic transmission,” and, predictably, “visual  
352 perception.” GO terms associated with neuron cell morphology, such as “neuronal cell  
353 body,” “axon,” and “neuron projection,” were also present, confirming our previous finding  
354 that the retina is not yet regenerated at 27 days, taking more than 35 days (Fig. 2). Plots  
355 with “biological processes” and “molecular processes” only (Fig. 4E) revealed GO terms  
356 associated with neuronal morphogenesis like “axonogenesis” and “positive regulation of  
357 synapse assembly,” suggesting that at 27 dpi, retinal progenitor cells had not yet fully  
358 differentiated into neurons.

359 The differential gene expression analysis of bulk RNA sequencing showed that the  
360 extracellular matrix and angiogenesis are important at the early-to-mid stage of axolotl  
361 retinal regeneration after a retinectomy. IGF and TGF- $\beta$  signaling may also regulate  
362 retinal regeneration. Neuronal activity and morphogenesis are not restored yet at this  
363 stage of regeneration.

364

## 365 **Notch signaling participates in axolotl retinal regeneration**

366 The RNA sequencing analysis revealed differential expression of *Hes1* and *Hes5*,  
367 both downstream effectors of the Notch signaling pathway. *Hes1* was upregulated ( $\log_2$   
368 fold change = 1.76, adjusted  $p=8.36 \times 10^{-45}$ ) and *Hes5* was downregulated ( $\log_2$  fold  
369 change = -2.37, adjusted  $p=2.37 \times 10^{-4}$ ) in the regenerating retina. GO annotation  
370 associated *Hes1* with “muscle organ development” (FDR = 0.0030), possibly indicating  
371 that axolotl retinal regeneration employs similar mechanisms as organ development.  
372 *Hes5* was represented by the following GO terms: “cell adhesion,” “brain development,”  
373 “neuron differentiation,” “positive regulation of BMP signaling pathway,” “cartilage  
374 development,” “regulation of cell differentiation,” and “negative regulation of  
375 oligodendrocyte differentiation” (all FDR values < 0.015). This analysis suggests that  
376 during axolotl retinal regeneration, *Hes5* regulates neuronal differentiation.

377 We qualitatively visualized the expression of *Hes1* and *Hes5*, along two other  
378 Notch pathway genes *Notch1* and *Jag1*, in one round and the expression of *Glast*, *Vim*,  
379 and *Rpe65* in the second round of multi-round HCR FISH in a regenerating (28 dpi) eye  
380 and the contralateral eye from the same animal ( $n=1$ ). *Hes1* was present in *Glast*- and  
381 *Vim*-expressing Müller glia in the uninjured retina. It was also present in *Glast*-expressing  
382 and *Vim*-expressing cells in the regenerating retina that were possibly also expressing  
383 *Rpe65* at low levels, although the omnipresence of the *Rpe65* fluorescent stain  
384 throughout the tissues complicated definitive identification of *Rpe65*-expressing cells (Fig.  
385 5A, B). Those cells may have been neural progenitor cells or Müller glia that had not yet  
386 developed their characteristic elongated morphology. *Hes5* was not detected in the  
387 uninjured retina but was present at low levels in the regenerating retina, co-expressed  
388 with *Vim* (Fig. 5C, D). *Notch1* and *Jag1*, Notch pathway receptor and ligand, were present  
389 throughout the uninjured and regenerating retina. Like in our previous finding (Fig. 2D'),  
390 *Vim* was strongly expressed in the regenerating retina. This visualization revealed that  
391 *Hes1* is expressed in Müller glia in the uninjured retina and possibly also during

392 regeneration, while *Hes5* is present at low levels in both conditions and its cellular  
393 residence remains unclear.

394 We manipulated Notch signaling during retinal regeneration to better understand  
395 its role in neuronal differentiation. We inserted small pieces of cotton balls soaked in either  
396 Notch inhibitor DAPT or solvent DMSO into retinectomized eyes (n=4) at 15 dpi, when  
397 cellular proliferation peaks (Fig. 2C'). The animals were then allowed to regenerate until  
398 101 dpi. Despite this prolonged regeneration period, regenerated retinal tissue was small  
399 and lacked well-defined lamination, possibly due to cotton balls in the eye. One animal  
400 was excluded from each treatment group because we could not find sections with  
401 regenerated retinas on those samples. Nevertheless, HCR FISH revealed rod marker  
402 *Rho* and Müller glia marker *Glast* in the regenerated retinal tissue. DAPT-treated eyes  
403 contained more *Rho*+ rod photoreceptors (p=0.041) than solvent-treated eyes (Fig. 5E-  
404 E'). The number of *Glast*+ Müller glia was similar in both conditions (p=0.27) (Fig. 5F-F').  
405 These differences in the cellular make-up of regenerated retinal tissue suggest that Notch  
406 signaling participates in regulating cell differentiation during axolotl retinal regeneration.

407

## 408 Discussion

409 A regenerating retina must produce the original cell types and repair the severed  
410 connections with the brain. We show here that adult axolotl salamanders are capable of  
411 both, regenerating retinal neural structures within three months after a retinectomy and  
412 re-establishing retinotectal projections within a year. To our best knowledge, we have also  
413 provided the first visualization of diverse cell types in the axolotl retina, as well as their  
414 regeneration.

415 The axolotl retina contains three possible cellular sources of regeneration: the  
416 CMZ, Müller glia, and the RPE. Cellular sources of retinal regeneration vary among  
417 species. Zebrafish repair injured retinas using Müller glia (Wan & Goldman, 2016); fire-  
418 bellied Japanese newts regenerate missing retinas from the RPE (Mitsuda et al., 2005);  
419 post-metamorphic frogs and embryonic chicks have been found to employ all three  
420 progenitor cell pools (Langhe et al., 2017; Mitashov & Maliovanova, 1982; Palazzo et al.,



421 2020; Tsonis & Del Rio-Tsonis, 2004; Yoshii et al., 2007). Mammalian retinas do not  
422 naturally regenerate, but regenerative responses have been elicited from cultured Müller  
423 glia, retinal margin (which anatomically corresponds to the CMZ), and the RPE (Akhtar et  
424 al., 2019; Giannelli et al., 2011; Kuwahara et al., 2015; Lawrence et al., 2007; Zhao et al.,  
425 1997). Such vast differences in cellular mechanisms of retinal regeneration among  
426 species warrant special attention to retinal progenitor cells in the highly regenerative  
427 tetrapod axolotl salamander. We observed that all dividing cells in early regeneration  
428 expressed *Vimentin* (*Vim*), and one-third also expressed Müller glia marker *Glast*. *Glast*-  
429 positive cells in the regenerating retina lacked the characteristic elongated morphology of  
430 Müller glia, but they also did not express the RPE marker *Rpe65* or its black pigment.  
431 RPE cells that lose pigment, downregulate RPE65, and express Vimentin are undergoing  
432 epithelial-to-mesenchymal transition (EMT) (Tamiya et al., 2010), which marks their new  
433 ability to migrate and proliferate (Zhou et al., 2020). This change in the RPE then enables  
434 salamander retinal regeneration (Islam et al., 2014). *Glast* may mark dedifferentiating  
435 RPE cells, as RPE cells downregulate *Rpe65* in the regenerating newt retina and *Glast*  
436 expression has previously been detected in the RPE (Derouiche & Rauen, 1995; Sakami  
437 et al., 2005). *Glast* is a Müller glia marker in the homeostatic retina, but it is also expressed  
438 in neural progenitor cells in the adult mouse brain (Slezak et al., 2007) and the developing  
439 human retina (Walcott & Provis, 2003). We suggest that axolotl retinal regeneration is  
440 driven by dedifferentiating cells of the RPE, which then give rise to *Glast*-expressing  
441 retinal progenitor cells. Using transgenic reporter axolotl lines in future studies will  
442 elucidate the dynamics of RPE reprogramming during axolotl retinal regeneration.

443 We also found more Müller glia in regenerated retinas than in uninjured ones,  
444 which suggests that Müller glia may participate in axolotl retinal regeneration.  
445 Alternatively, Müller glia are the last cells born in a developing mammalian retina (Sawant  
446 et al., 2019). This pattern may be recapitulated in the regenerating axolotl retina and the  
447 numbers of newborn glia may take longer than 377 days to reach baseline levels.  
448 However, this is only feasible if axolotl retinal regeneration is driven entirely by the RPE.  
449 Developing transgenic reporter axolotls in the future will elucidate the cellular source of  
450 retinal regeneration after a retinectomy. Using focal retinal injuries that fully preserve  
451 Müller glia populations will further clarify their role in axolotl retinal regeneration.

452 We observed increased cell proliferation in the intact contralateral eyes. In axolotl  
453 regeneration, cells re-enter the cell cycle even at sources distant from the injury. Limb  
454 amputation triggers cell-cycle activation in the contralateral, uninjured limbs, but also in  
455 other organs (Johnson et al., 2018). After a lung injury, a variety of cell types proliferate  
456 in the contralateral, uninjured lung (Jensen et al., 2021). In a regenerating tail,  
457 proliferating cells can be detected in the spinal cord as far as 5 mm away from the  
458 amputation site (Duerr et al., 2021). It remains unclear what drives this spike in  
459 proliferation, but the uninjured contralateral eye may have received growth signals from  
460 the brain, which connects the two eyes.

461 Regenerated axolotl retinas contained all the major retinal cell types and  
462 reconnected with the brain. However, they were thinner and did not regenerate the  
463 original cell diversity, containing fewer neuronal types of the inner nuclear layer and more  
464 Müller glia. This imperfect regeneration of an axolotl neural structure is consistent with a  
465 previous observation that the regenerating axolotl brain fails to re-establish pre-existing  
466 cytoarchitecture (Amamoto et al., 2016). However, since we compared the regenerated  
467 retinas to the uninjured contralateral ones, the regenerated retinas might have been  
468 thinner due to a spike in cellular proliferation in contralateral eyes in early regeneration  
469 (Fig. 2D'). Finally, retinal regeneration is shaped by neural activity (Chiao et al., 2020).  
470 As adult axolotls do not regenerate lenses, re-establishment of correct neuronal networks  
471 may suffer from the permanent absence of visual input. Unveiling the molecular  
472 mechanisms behind retinal regeneration will help understand how it can be regulated to  
473 yield more complete retinal structures.

474 In species that regenerate the retina from the RPE, this cell monolayer reprograms  
475 to give rise to the neural retina using FGF2 (Sakaguchi et al., 1997; Tangeman et al.,  
476 2021), and retinal regeneration can be induced by supplying FGF2 to the retinectomized  
477 eye (Vergara & Del Rio-Tsonis, 2009). The function of FGF2 may be mediating tissue  
478 interactions between the choroid and the RPE, which are important for RPE proliferation  
479 (Fronk & Vargis, 2016; Mitsuda et al., 2005). We did not supply any pro-regenerative  
480 factors to retinectomized axolotl eyes and saw that the proportion of regenerated retinas  
481 varied from 50% (Fig. 2) to 100% (Fig. 3), although foreign bodies in the intraocular space

482 hindered regeneration (Fig. 5). In the future, the success rate of adult axolotl retinal  
483 regeneration may be further improved by either carrying out retinectomies with extra care  
484 to preserve choroid-RPE interaction, or by experimenting with FGF2 supplementation.

485 We conducted bulk RNA sequencing of homeostatic and regenerating axolotl  
486 retinas. The analysis revealed that at 27 dpi, the regenerating axolotl retina had not yet  
487 re-established such essential characteristics as neuronal projections or glutamatergic  
488 synaptic signaling. At this timepoint, the injured retina is in early-to-mid regeneration.  
489 Genes associated with ECM and angiogenesis were largely upregulated in regenerating  
490 retinas. Molecular mechanisms that may regulate early-to-mid stage of axolotl retinal  
491 regeneration also include IGF signaling, TGF- $\beta$  signaling, and calcium binding. IGF  
492 signaling participates in retinal progenitor proliferation in fish retina (Becker et al., 2021)  
493 and differentiation in mammalian retina (Xia et al., 2018), so it may regulate retinal  
494 progenitors in the regenerating axolotl retina. Proteins in the IGF signaling network also  
495 regulate angiogenesis (Contois et al., 2012; Delafontaine et al., 2004), possibly linking  
496 IGF signaling with angiogenic activity in the regenerating axolotl retina. TGF- $\beta$  regulates  
497 proliferation of retinal progenitor cells in the regenerating zebrafish retina (Sharma et al.,  
498 2020), possibly playing a similar role in axolotl retinal regeneration.

499 The ECM also plays a pivotal role in neural regeneration. Fibronectin is  
500 upregulated during early regeneration of newt retina (Ortiz et al., 1992), which agrees  
501 with our RNA-Seq data. The ECM of *Xenopus* retinal neuroepithelium cell line promoted  
502 axonal outgrowth (Sakaguchi & Radke, 1996), and ECM remodeling in mouse retinal  
503 explants improved integration of grafted photoreceptors (Tucker et al., 2008), suggesting  
504 that ECM changes may regulate formation of new neuronal networks.

505 The RNA sequencing analysis also suggested a role for Notch signaling in axolotl  
506 retinal regeneration. Notch signaling is a promising candidate for controlling regeneration  
507 of retinal cell diversity. The Notch signaling pathway regulates glial and neuronal fate in  
508 differentiating neural progenitors, favoring glial fate (Gaiano & Fishell, 2002; Grandbarbe  
509 et al., 2003). We used RNA sequencing analysis and visualized its results with HCR FISH  
510 to show that two Notch downstream effector genes, *Hes1* and *Hes5*, are differentially  
511 expressed during axolotl retinal regeneration. *Hes1* was expressed in Müller glia in an

512 uninjured retina and upregulated in a regenerating retina at 28 dpi. *Hes5* was  
513 downregulated during regeneration, although we only detected its weak expression in the  
514 retina. These two Notch pathway genes have distinct functions during retinogenesis:  
515 *Hes1* maintains retinal progenitor cells in an undifferentiated state, while *Hes5* promotes  
516 their glial fate and inhibits their differentiation into neurons (Hojo et al., 2000). *Hes5*, but  
517 not *Hes1*, was upregulated in the embryonic chick retina after an excitotoxic injury (Hayes  
518 et al., 2007). Our analysis shows the opposite pattern, although it may have been carried  
519 out at a different stage of retinal regeneration and employed a different injury method (3  
520 days post excitotoxic injury in chicks vs. 27 days post retinectomy in axolotls).  
521 Upregulation of *Hes1* may indicate that it contributes to maintaining a pool of progenitor  
522 cells that are necessary for regrowing the retina. Downregulation of *Hes5* suggests that  
523 at 28 dpi, retinal progenitor cells may be committing to a specific fate, emphasizing the  
524 role of Notch signaling in retinal differentiation.

525 Notch signaling favors glial and progenitor cell fate in the retina (Jadhav et al.,  
526 2006). Inhibiting Notch signaling promotes regeneration of neurons, such as hair cells  
527 and motor neurons of the spinal cord (Dias et al., 2012; Mizutani et al., 2013). In the retina,  
528 inhibition of Notch triggers a regenerative response (Conner et al., 2014; Elsaiedi et al.,  
529 2018; Hayes et al., 2007), and its dynamic regulation is required for regeneration of the  
530 zebrafish retina (Campbell et al., 2022). In Japanese fire-bellied newts, intraocular  
531 inhibition of Notch accelerated formation of neurons during early regeneration of the retina  
532 (Nakamura & Chiba, 2007). We show here that early inhibition of Notch signaling also  
533 impacts retinal regeneration in the long term, driving production of rod photoreceptors. If  
534 Müller glia self-renew in axolotls like in zebrafish (Langhe & Pearson, 2020; Meyers et  
535 al., 2012), they may have compensated Notch inhibition-induced deficit in their numbers  
536 during regeneration. Our finding emphasizes Notch signaling as an important regulator of  
537 cell diversity during retinal regeneration.

538 The axolotl salamander is a useful model of retinal regeneration because it  
539 regenerates its retina even in adulthood and accommodates techniques of assessing and  
540 manipulating gene expression. Much larger than zebrafish, axolotls are amenable to  
541 retinectomies and more focal injuries like light or excitotoxicity; studying retinal responses

542 to different injuries may help clarify how different progenitor cells function in regeneration.  
543 Unlike some newt species, axolotls are also easy to breed in a laboratory and to develop  
544 into transgenic lines (Joven et al., 2019), which will aid future studies of their retinal  
545 regeneration. In addition, retinectomies - often-used models of retinal injury in  
546 salamanders - require removing both the retina and the lens. Newts can regenerate their  
547 lenses, but axolotls lose this ability soon after hatching (Suetsugu-Maki et al., 2012).  
548 Therefore, retinectomized axolotl eyes only regrow the retina without concurrently  
549 regenerating the lens, and any regenerative processes, such as cell proliferation, can  
550 likely be attributed to retinal regeneration. Studies on behavior and gene expression of  
551 axolotl retinal progenitors will enrich our understanding of retinal regeneration across the  
552 phylogeny, harness the regenerative power of those cell types in the human retina, and,  
553 in the future, help place humans among species that can repair their retinas.

## 554 Acknowledgements

555           The funding was provided by the Retina Research Foundation (to JRM) and NSF  
556           award #1606128 (to RLC and JRM). The Ambystoma Genetic Stock Center (Lexington,  
557           KY) is supported by the NIH grant P40-OD019794. The funding sources were not involved  
558           in the study design or execution.

559           The high-performance computing resources for RNA-Seq analysis were provided  
560           by the Northeastern Discovery cluster at the Massachusetts Green-High Performance  
561           Computing Center in Holyoke, MA. We thank the Institute for Chemical Imaging of Living  
562           Systems at Northeastern University for consultation and imaging support. We also thank  
563           Dr. Alexander Lovely for assistance with imaging and Jackson Griffiths for insightful  
564           comments on the manuscript.

## 565 References

- 566 Akhtar, T., Xie, H., Khan, M. I., Zhao, H., Bao, J., Zhang, M., & Xue, T. (2019). Accelerated  
567 photoreceptor differentiation of hiPSC-derived retinal organoids by contact co-culture with  
568 retinal pigment epithelium. *Stem Cell Res*, 39, 101491.  
569 <https://doi.org/10.1016/j.scr.2019.101491>
- 570 Al-Hussaini, H., Kam, J. H., Vugler, A., Semo, M., & Jeffery, G. (2008). Mature retinal pigment  
571 epithelium cells are retained in the cell cycle and proliferate in vivo. *Mol Vis*, 14, 1784-  
572 1791. <https://www.ncbi.nlm.nih.gov/pubmed/18843376>
- 573 Altschul, S. F., Gish, W., Miller, W., Myers, E. W., & Lipman, D. J. (1990). Basic local alignment  
574 search tool. *J Mol Biol*, 215(3), 403-410. [https://doi.org/10.1016/S0022-2836\(05\)80360-2](https://doi.org/10.1016/S0022-2836(05)80360-2)
- 575 Amamoto, R., Huerta, V. G., Takahashi, E., Dai, G., Grant, A. K., Fu, Z., & Arlotta, P. (2016).  
576 Adult axolotls can regenerate original neuronal diversity in response to brain injury.  
577 *Elife*, 5. <https://doi.org/10.7554/eLife.13998>
- 578 Andrews, S. (2010). FastQC: a quality control tool for high throughput sequence data.
- 579 Ashburner, M., Ball, C. A., Blake, J. A., Botstein, D., Butler, H., Cherry, J. M., Davis, A.  
580 P., Dolinski, K., Dwight, S. S., Eppig, J. T., Harris, M. A., Hill, D. P., Issel-Tarver,  
581 L., Kasarskis, A., Lewis, S., Matese, J. C., Richardson, J. E., Ringwald, M., Rubin,  
582 G. M., . . . Consortium, G. O. (2000). Gene Ontology: tool for the unification of  
583 biology. *Nature Genetics*, 25(1), 25-29. <https://doi.org/Doi 10.1038/75556>
- 584 Becker, C., Lust, K., & Wittbrodt, J. (2021). Igf signaling couples retina growth with body  
585 growth by modulating progenitor cell division. *Development*, 148(7).  
586 <https://doi.org/10.1242/dev.199133>
- 587 Beliveau, B. J., Kishi, J. Y., Nir, G., Sasaki, H. M., Saka, S. K., Nguyen, S. C., Wu, C. T., & Yin,  
588 P. (2018). OligoMiner provides a rapid, flexible environment for the design of genome-  
589 scale oligonucleotide in situ hybridization probes. *Proc Natl Acad Sci U S A*, 115(10),  
590 E2183-E2192. <https://doi.org/10.1073/pnas.1714530115>
- 591 Bolger, A. M., Lohse, M., & Usadel, B. (2014). Trimmomatic: a flexible trimmer for Illumina  
592 sequence data. *Bioinformatics*, 30(15), 2114-2120.  
593 <https://doi.org/10.1093/bioinformatics/btu170>
- 594 Bryant, D. M., Johnson, K., DiTommaso, T., Tickle, T., Couger, M. B., Payzin-Dogru, D., Lee, T.  
595 J., Leigh, N. D., Kuo, T. H., Davis, F. G., Bateman, J., Bryant, S., Guzikowski, A. R., Tsai,  
596 S. L., Coyne, S., Ye, W. W., Freeman, R. M., Jr., Peshkin, L., Tabin, C. J., . . . Whited, J.  
597 L. (2017). A Tissue-Mapped Axolotl De Novo Transcriptome Enables Identification of Limb  
598 Regeneration Factors. *Cell Rep*, 18(3), 762-776.  
599 <https://doi.org/10.1016/j.celrep.2016.12.063>
- 600 Campbell, L. J., Levendusky, J. L., Steines, S. A., & Hyde, D. R. (2022). Retinal regeneration  
601 requires dynamic Notch signaling. *Neural Regen Res*, 17(6), 1199-1209.  
602 <https://doi.org/10.4103/1673-5374.327326>
- 603 Chiao, C. C., Lin, C. I., & Lee, M. J. (2020). Multiple Approaches for Enhancing Neural Activity to  
604 Promote Neurite Outgrowth of Retinal Explants. *Methods Mol Biol*, 2092, 65-75.  
605 [https://doi.org/10.1007/978-1-0716-0175-4\\_6](https://doi.org/10.1007/978-1-0716-0175-4_6)
- 606 Conner, C., Ackerman, K. M., Lahne, M., Hobgood, J. S., & Hyde, D. R. (2014). Repressing notch  
607 signaling and expressing TNFalpha are sufficient to mimic retinal regeneration by inducing  
608 Muller glial proliferation to generate committed progenitor cells. *J Neurosci*, 34(43), 14403-  
609 14419. <https://doi.org/10.1523/JNEUROSCI.0498-14.2014>
- 610 Contois, L. W., Nugent, D. P., Caron, J. M., Cretu, A., Tweedie, E., Akalu, A., Liebes, L., Friesel,  
611 R., Rosen, C., Vary, C., & Brooks, P. C. (2012). Insulin-like growth factor binding protein-  
612 4 differentially inhibits growth factor-induced angiogenesis. *J Biol Chem*, 287(3), 1779-  
613 1789. <https://doi.org/10.1074/jbc.M111.267732>



- 614 Delafontaine, P., Song, Y. H., & Li, Y. (2004). Expression, regulation, and function of IGF-1, IGF-  
615 1R, and IGF-1 binding proteins in blood vessels. *Arterioscler Thromb Vasc Biol*, 24(3),  
616 435-444. <https://doi.org/10.1161/01.ATV.0000105902.89459.09>
- 617 Derouiche, A., & Rauen, T. (1995). Coincidence of L-glutamate/L-aspartate transporter (GLAST)  
618 and glutamine synthetase (GS) immunoreactions in retinal glia: evidence for coupling of  
619 GLAST and GS in transmitter clearance. *J Neurosci Res*, 42(1), 131-143.  
620 <https://doi.org/10.1002/jnr.490420115>
- 621 Dias, T. B., Yang, Y. J., Ogai, K., Becker, T., & Becker, C. G. (2012). Notch signaling controls  
622 generation of motor neurons in the lesioned spinal cord of adult zebrafish. *J Neurosci*,  
623 32(9), 3245-3252. <https://doi.org/10.1523/JNEUROSCI.6398-11.2012>
- 624 Duerr, T. J., Jeon, E. K., Wells, K. M., Villanueva, A., Seifert, A. W., McCusker, C. D., &  
625 Monaghan, J. R. (2021). A constitutively expressed fluorescence ubiquitin cell cycle  
626 indicator (FUCCI) in axolotls for studying tissue regeneration. *bioRxiv*,  
627 2021.2003.2030.437716. <https://doi.org/10.1101/2021.03.30.437716>
- 628 Elsaiedi, F., Macpherson, P., Mills, E. A., Jui, J., Flannery, J. G., & Goldman, D. (2018). Notch  
629 Suppression Collaborates with Ascl1 and Lin28 to Unleash a Regenerative Response in  
630 Fish Retina, But Not in Mice. *J Neurosci*, 38(9), 2246-2261.  
631 <https://doi.org/10.1523/JNEUROSCI.2126-17.2018>
- 632 Erler, P., Sweeney, A., & Monaghan, J. R. (2017). Regulation of Injury-Induced Ovarian  
633 Regeneration by Activation of Oogonial Stem Cells. *Stem Cells*, 35(1), 236-247.  
634 <https://doi.org/10.1002/stem.2504>
- 635 Fronk, A. H., & Vargis, E. (2016). Methods for culturing retinal pigment epithelial cells: a review  
636 of current protocols and future recommendations. *J Tissue Eng*, 7, 2041731416650838.  
637 <https://doi.org/10.1177/2041731416650838>
- 638 Gaiano, N., & Fishell, G. (2002). The role of notch in promoting glial and neural stem cell fates.  
639 *Annu Rev Neurosci*, 25, 471-490.  
640 <https://doi.org/10.1146/annurev.neuro.25.030702.130823>
- 641 Gemberling, M., Bailey, T. J., Hyde, D. R., & Poss, K. D. (2013). The zebrafish as a model for  
642 complex tissue regeneration. *Trends in Genetics*, 29(11), 611-620.  
643 <https://doi.org/10.1016/j.tig.2013.07.003>
- 644 Gene Ontology, C. (2021). The Gene Ontology resource: enriching a GOld mine. *Nucleic Acids*  
645 *Res*, 49(D1), D325-D334. <https://doi.org/10.1093/nar/gkaa1113>
- 646 Giannelli, S. G., Demontis, G. C., Pertile, G., Rama, P., & Broccoli, V. (2011). Adult human Muller  
647 glia cells are a highly efficient source of rod photoreceptors. *Stem Cells*, 29(2), 344-356.  
648 <https://doi.org/10.1002/stem.579>
- 649 Grabherr, M. G., Haas, B. J., Yassour, M., Levin, J. Z., Thompson, D. A., Amit, I., Adiconis, X.,  
650 Fan, L., Raychowdhury, R., Zeng, Q., Chen, Z., Mauceli, E., Hacohen, N., Gnirke, A.,  
651 Rhind, N., di Palma, F., Birren, B. W., Nusbaum, C., Lindblad-Toh, K., . . . Regev, A.  
652 (2011). Full-length transcriptome assembly from RNA-Seq data without a reference  
653 genome. *Nat Biotechnol*, 29(7), 644-652. <https://doi.org/10.1038/nbt.1883>
- 654 Grandbarbe, L., Bouissac, J., Rand, M., Hrabe de Angelis, M., Artavanis-Tsakonas, S., & Mohier,  
655 E. (2003). Delta-Notch signaling controls the generation of neurons/glia from neural stem  
656 cells in a stepwise process. *Development*, 130(7), 1391-1402.  
657 <https://doi.org/10.1242/dev.00374>
- 658 Guidry, C., Medeiros, N. E., & Curcio, C. A. (2002). Phenotypic variation of retinal pigment  
659 epithelium in age-related macular degeneration. *Invest Ophthalmol Vis Sci*, 43(1), 267-  
660 273. <https://www.ncbi.nlm.nih.gov/pubmed/11773041>
- 661 Wickham, H. (2016). ggplot2: Elegant Graphics for Data Analysis. *Springer-Verlag New York*.
- 662 Haverkamp, S., Haeseleer, F., & Hendrickson, A. (2003). A comparison of immunocytochemical  
663 markers to identify bipolar cell types in human and monkey retina. *Vis Neurosci*, 20(6),  
664 589-600. <https://doi.org/10.1017/s0952523803206015>

- 665 Hayes, S., Nelson, B. R., Buckingham, B., & Reh, T. A. (2007). Notch signaling regulates  
666 regeneration in the avian retina. *Dev Biol*, 312(1), 300-311.  
667 <https://doi.org/10.1016/j.ydbio.2007.09.046>
- 668 Hojo, M., Ohtsuka, T., Hashimoto, N., Gradwohl, G., Guillemot, F., & Kageyama, R. (2000). Glial  
669 cell fate specification modulated by the bHLH gene Hes5 in mouse retina. *Development*,  
670 127(12), 2515-2522. <https://www.ncbi.nlm.nih.gov/pubmed/10821751>
- 671 Islam, M. R., Nakamura, K., Casco-Robles, M. M., Kunahong, A., Inami, W., Toyama, F., Maruo,  
672 F., & Chiba, C. (2014). The newt reprograms mature RPE cells into a unique multipotent  
673 state for retinal regeneration. *Sci Rep*, 4, 6043. <https://doi.org/10.1038/srep06043>
- 674 Jadhav, A. P., Cho, S. H., & Cepko, C. L. (2006). Notch activity permits retinal cells to progress  
675 through multiple progenitor states and acquire a stem cell property. *Proc Natl Acad Sci U*  
676 *S A*, 103(50), 18998-19003. <https://doi.org/10.1073/pnas.0608155103>
- 677 Jensen, T. B., Giunta, P., Schultz, N. G., Griffiths, J. M., Duerr, T. J., Kyeremateng, Y., Wong, H.,  
678 Adesina, A., & Monaghan, J. R. (2021). Lung injury in axolotl salamanders induces an  
679 organ-wide proliferation response. *Dev Dyn*, 250(6), 866-879.  
680 <https://doi.org/10.1002/dvdy.315>
- 681 Johnson, K., Bateman, J., DiTommaso, T., Wong, A. Y., & Whited, J. L. (2018). Systemic cell  
682 cycle activation is induced following complex tissue injury in axolotl. *Dev Biol*, 433(2), 461-  
683 472. <https://doi.org/10.1016/j.ydbio.2017.07.010>
- 684 Joven, A., Elewa, A., & Simon, A. (2019). Model systems for regeneration: salamanders.  
685 *Development*, 146(14). <https://doi.org/10.1242/dev.167700>
- 686 Kuwahara, A., Ozone, C., Nakano, T., Saito, K., Eiraku, M., & Sasai, Y. (2015). Generation of a  
687 ciliary margin-like stem cell niche from self-organizing human retinal tissue. *Nat Commun*,  
688 6, 6286. <https://doi.org/10.1038/ncomms7286>
- 689 Langhe, R., Chesneau, A., Colozza, G., Hidalgo, M., Ail, D., Locker, M., & Perron, M. (2017).  
690 Muller glial cell reactivation in Xenopus models of retinal degeneration. *Glia*, 65(8), 1333-  
691 1349. <https://doi.org/10.1002/glia.23165>
- 692 Langhe, R., & Pearson, R. A. (2020). Rebuilding the Retina: Prospects for Muller Glial-mediated  
693 Self-repair. *Curr Eye Res*, 45(3), 349-360.  
694 <https://doi.org/10.1080/02713683.2019.1669665>
- 695 Langmead, B., & Salzberg, S. L. (2012). Fast gapped-read alignment with Bowtie 2. *Nat Methods*,  
696 9(4), 357-359. <https://doi.org/10.1038/nmeth.1923>
- 697 Lawrence, J. M., Singhal, S., Bhatia, B., Keegan, D. J., Reh, T. A., Luthert, P. J., Khaw, P. T., &  
698 Limb, G. A. (2007). MIO-M1 cells and similar Muller glial cell lines derived from adult  
699 human retina exhibit neural stem cell characteristics. *Stem Cells*, 25(8), 2033-2043.  
700 <https://doi.org/10.1634/stemcells.2006-0724>
- 701 Love, M. I., Huber, W., & Anders, S. (2014). Moderated estimation of fold change and dispersion  
702 for RNA-seq data with DESeq2. *Genome Biol*, 15(12), 550.  
703 <https://doi.org/10.1186/s13059-014-0550-8>
- 704 Maden, M., Manwell, L. A., & Ormerod, B. K. (2013). Proliferation zones in the axolotl brain and  
705 regeneration of the telencephalon. *Neural Dev*, 8, 1. [https://doi.org/10.1186/1749-8104-8-](https://doi.org/10.1186/1749-8104-8-1)  
706 [1](https://doi.org/10.1186/1749-8104-8-1)
- 707 Meyers, J. R., Hu, L., Moses, A., Kaboli, K., Papandrea, A., & Raymond, P. A. (2012). beta-  
708 catenin/Wnt signaling controls progenitor fate in the developing and regenerating  
709 zebrafish retina. *Neural Dev*, 7, 30. <https://doi.org/10.1186/1749-8104-7-30>
- 710 Mi, H., Muruganujan, A., Ebert, D., Huang, X., & Thomas, P. D. (2019). PANTHER version 14:  
711 more genomes, a new PANTHER GO-slim and improvements in enrichment analysis  
712 tools. *Nucleic Acids Res*, 47(D1), D419-D426. <https://doi.org/10.1093/nar/gky1038>
- 713 Mitashov, V. I. (1996). Mechanisms of retina regeneration in urodeles. *International Journal of*  
714 *Developmental Biology*, 40(4), 833-844. <Go to ISI>://WOS:A1996VE44100028

- 715 Mitashov, V. I., & Maliovanova, S. D. (1982). [Cellular proliferative potentials of the pigment and  
716 ciliated epithelium of the eye in clawed toads normally and during regeneration].  
717 *Ontogenez*, 13(3), 228-234. <https://www.ncbi.nlm.nih.gov/pubmed/7099515>  
718 (Proliferativnye potentsii kletok pigmentnogo i tsiliarnogo epiteliaa glaza shportsevykh  
719 liagushek v norme i pri regeneratsii.)
- 720 Mitsuda, S., Yoshii, C., Ikegami, Y., & Araki, M. (2005). Tissue interaction between the retinal  
721 pigment epithelium and the choroid triggers retinal regeneration of the newt *Cynops*  
722 *pyrrhogaster*. *Dev Biol*, 280(1), 122-132. <https://doi.org/10.1016/j.ydbio.2005.01.009>
- 723 Mizutari, K., Fujioka, M., Hosoya, M., Bramhall, N., Okano, H. J., Okano, H., & Edge, A. S. (2013).  
724 Notch inhibition induces cochlear hair cell regeneration and recovery of hearing after  
725 acoustic trauma. *Neuron*, 77(1), 58-69. <https://doi.org/10.1016/j.neuron.2012.10.032>
- 726 Nakamura, K., & Chiba, C. (2007). Evidence for Notch signaling involvement in retinal  
727 regeneration of adult newt. *Brain Res*, 1136(1), 28-42.  
728 <https://doi.org/10.1016/j.brainres.2006.12.032>
- 729 Nakhai, H., Sel, S., Favor, J., Mendoza-Torres, L., Paulsen, F., Duncker, G. I., & Schmid, R. M.  
730 (2007). Ptf1a is essential for the differentiation of GABAergic and glycinergic amacrine  
731 cells and horizontal cells in the mouse retina. *Development*, 134(6), 1151-1160.  
732 <https://doi.org/10.1242/dev.02781>
- 733 Nowoshilow, S., Schloissnig, S., Fei, J. F., Dahl, A., Pang, A. W. C., Pippel, M., Winkler, S.,  
734 Hastie, A. R., Young, G., Roscito, J. G., Falcon, F., Knapp, D., Powell, S., Cruz, A., Cao,  
735 H., Habermann, B., Hiller, M., Tanaka, E. M., & Myers, E. W. (2018). The axolotl genome  
736 and the evolution of key tissue formation regulators. *Nature*, 554(7690), 50-55.  
737 <https://doi.org/10.1038/nature25458>
- 738 Nowoshilow, S., & Tanaka, E. M. (2020). Introducing [www.axolotl-omics.org](http://www.axolotl-omics.org) - an integrated -  
739 omics data portal for the axolotl research community. *Exp Cell Res*, 394(1), 112143.  
740 <https://doi.org/10.1016/j.yexcr.2020.112143>
- 741 Ohashi, A., Saito, N., Kashimoto, R., Furukawa, S., Yamamoto, S., & Satoh, A. (2021). Axolotl  
742 liver regeneration is accomplished via compensatory congestion mechanisms regulated  
743 by ERK signaling after partial hepatectomy. *Dev Dyn*, 250(6), 838-851.  
744 <https://doi.org/10.1002/dvdy.262>
- 745 Ortiz, J. R., Vigny, M., Courtois, Y., & Jeanny, J. C. (1992). Immunocytochemical study of  
746 extracellular matrix components during lens and neural retina regeneration in the adult  
747 newt. *Exp Eye Res*, 54(6), 861-870. [https://doi.org/10.1016/0014-4835\(92\)90149-m](https://doi.org/10.1016/0014-4835(92)90149-m)
- 748 Osakada, F., Ikeda, H., Mandai, M., Wataya, T., Watanabe, K., Yoshimura, N., Akaike, A., Sasai,  
749 Y., & Takahashi, M. (2008). Toward the generation of rod and cone photoreceptors from  
750 mouse, monkey and human embryonic stem cells. *Nat Biotechnol*, 26(2), 215-224.  
751 <https://doi.org/10.1038/nbt1384>
- 752 Palazzo, I., Deistler, K., Hoang, T. V., Blackshaw, S., & Fischer, A. J. (2020). NF-kappaB signaling  
753 regulates the formation of proliferating Muller glia-derived progenitor cells in the avian  
754 retina. *Development*, 147(10). <https://doi.org/10.1242/dev.183418>
- 755 Patro, R., Duggal, G., Love, M. I., Irizarry, R. A., & Kingsford, C. (2017). Salmon provides fast and  
756 bias-aware quantification of transcript expression. *Nat Methods*, 14(4), 417-419.  
757 <https://doi.org/10.1038/nmeth.4197>
- 758 Poche, R. A., Kwan, K. M., Raven, M. A., Furuta, Y., Reese, B. E., & Behringer, R. R. (2007).  
759 Lim1 is essential for the correct laminar positioning of retinal horizontal cells. *J Neurosci*,  
760 27(51), 14099-14107. <https://doi.org/10.1523/JNEUROSCI.4046-07.2007>
- 761 Quintero, H., Gomez-Montalvo, A. I., & Lamas, M. (2016). MicroRNA changes through Muller glia  
762 dedifferentiation and early/late rod photoreceptor differentiation. *Neuroscience*, 316, 109-  
763 121. <https://doi.org/10.1016/j.neuroscience.2015.12.025>
- 764 RStudio Team (2020). RStudio: Integrated Development for R. RStudio, PBC, Boston, MA  
765 <http://www.rstudio.com/>

- 766 Sakaguchi, D. S., Janick, L. M., & Reh, T. A. (1997). Basic fibroblast growth factor (FGF-2)  
767 induced transdifferentiation of retinal pigment epithelium: generation of retinal neurons  
768 and glia. *Dev Dyn*, 209(4), 387-398. [https://doi.org/10.1002/\(SICI\)1097-](https://doi.org/10.1002/(SICI)1097-0177(199708)209:4<387::AID-AJA6>3.0.CO;2-E)  
769 [0177\(199708\)209:4<387::AID-AJA6>3.0.CO;2-E](https://doi.org/10.1002/(SICI)1097-0177(199708)209:4<387::AID-AJA6>3.0.CO;2-E)
- 770 Sakaguchi, D. S., & Radke, K. (1996). Beta 1 integrins regulate axon outgrowth and glial cell  
771 spreading on a glial-derived extracellular matrix during development and regeneration.  
772 *Brain Res Dev Brain Res*, 97(2), 235-250. [https://doi.org/10.1016/s0165-3806\(96\)00142-](https://doi.org/10.1016/s0165-3806(96)00142-3)  
773 [3](https://doi.org/10.1016/s0165-3806(96)00142-3)
- 774 Sakami, S., Hisatomi, O., Sakakibara, S., Liu, J., Reh, T. A., & Tokunaga, F. (2005).  
775 Downregulation of Otx2 in the dedifferentiated RPE cells of regenerating newt retina. *Brain*  
776 *Res Dev Brain Res*, 155(1), 49-59. <https://doi.org/10.1016/j.devbrainres.2004.11.008>
- 777 Sawant, O. B., Jidigam, V. K., Fuller, R. D., Zucaro, O. F., Kpegba, C., Yu, M., Peachey, N. S., &  
778 Rao, S. (2019). The circadian clock gene Bmal1 is required to control the timing of retinal  
779 neurogenesis and lamination of Muller glia in the mouse retina. *FASEB J*, 33(8), 8745-  
780 8758. <https://doi.org/10.1096/fj.201801832RR>
- 781 Sharma, P., Gupta, S., Chaudhary, M., Mitra, S., Chawla, B., Khursheed, M. A., Saran, N. K., &  
782 Ramachandran, R. (2020). Biphasic Role of Tgf-beta Signaling during Muller Glia  
783 Reprogramming and Retinal Regeneration in Zebrafish. *iScience*, 23(2), 100817.  
784 <https://doi.org/10.1016/j.isci.2019.100817>
- 785 Simon, A., & Tanaka, E. M. (2013). Limb regeneration. *Wiley Interdiscip Rev Dev Biol*, 2(2), 291-  
786 300. <https://doi.org/10.1002/wdev.73>
- 787 Slezak, M., Goritz, C., Niemiec, A., Frisen, J., Chambon, P., Metzger, D., & Pfrieder, F. W. (2007).  
788 Transgenic mice for conditional gene manipulation in astroglial cells. *Glia*, 55(15), 1565-  
789 1576. <https://doi.org/10.1002/glia.20570>
- 790 Smith, J. J., Timoshevskaya, N., Timoshevskiy, V. A., Keinath, M. C., Hardy, D., & Voss, S. R.  
791 (2019). A chromosome-scale assembly of the axolotl genome. *Genome Res*, 29(2), 317-  
792 324. <https://doi.org/10.1101/gr.241901.118>
- 793 Suetsugu-Maki, R., Maki, N., Nakamura, K., Sumanas, S., Zhu, J., Del Rio-Tsonis, K., & Tsonis,  
794 P. A. (2012). Lens regeneration in axolotl: new evidence of developmental plasticity. *BMC*  
795 *Biol*, 10, 103. <https://doi.org/10.1186/1741-7007-10-103>
- 796 Svistunov, S. A., & Mitashov, V. I. (1983). [Proliferative activity of the pigment epithelium and  
797 regenerating retinal cells in *Ambystoma mexicanum*]. *Ontogeny*, 14(6), 597-606.  
798 <https://www.ncbi.nlm.nih.gov/pubmed/6657169> (Proliferativnaia aktivnost' kletok  
799 pigmentnogo epiteliia i regeneriruiushchei setchatki u *Ambystoma mexicanum*.)
- 800 Tamiya, S., Liu, L., & Kaplan, H. J. (2010). Epithelial-mesenchymal transition and proliferation of  
801 retinal pigment epithelial cells initiated upon loss of cell-cell contact. *Invest Ophthalmol Vis*  
802 *Sci*, 51(5), 2755-2763. <https://doi.org/10.1167/iovs.09-4725>
- 803 Tangeman, J. A., Luz-Madrigal, A., Sreeskandarajan, S., Grajales-Esquivel, E., Liu, L., Liang, C.,  
804 Tsonis, P. A., & Del Rio-Tsonis, K. (2021). Transcriptome Profiling of Embryonic Retinal  
805 Pigment Epithelium Reprogramming. *Genes (Basel)*, 12(6).  
806 <https://doi.org/10.3390/genes12060840>
- 807 Tazaki, A., Tanaka, E. M., & Fei, J. F. (2017). Salamander spinal cord regeneration: The ultimate  
808 positive control in vertebrate spinal cord regeneration. *Dev Biol*, 432(1), 63-71.  
809 <https://doi.org/10.1016/j.ydbio.2017.09.034>
- 810 Team, R. (2020). *RStudio: Integrated Development for R*. <http://www.rstudio.com/>.
- 811 Thummel, R., Kassen, S. C., Enright, J. M., Nelson, C. M., Montgomery, J. E., & Hyde, D. R.  
812 (2008). Characterization of Muller glia and neuronal progenitors during adult zebrafish  
813 retinal regeneration. *Exp Eye Res*, 87(5), 433-444.  
814 <https://doi.org/10.1016/j.exer.2008.07.009>



- 815 Tsonis, P. A., & Del Rio-Tsonis, K. (2004). Lens and retina regeneration: transdifferentiation, stem  
816 cells and clinical applications. *Exp Eye Res*, 78(2), 161-172.  
817 <https://doi.org/10.1016/j.exer.2003.10.022>
- 818 Tucker, B., Klassen, H., Yang, L., Chen, D. F., & Young, M. J. (2008). Elevated MMP Expression  
819 in the MRL Mouse Retina Creates a Permissive Environment for Retinal Regeneration.  
820 *Invest Ophthalmol Vis Sci*, 49(4), 1686-1695. <https://doi.org/10.1167/iovs.07-1058>
- 821 UniProt, C. (2021). UniProt: the universal protein knowledgebase in 2021. *Nucleic Acids Res*,  
822 49(D1), D480-D489. <https://doi.org/10.1093/nar/gkaa1100>
- 823 Vergara, M. N., & Del Rio-Tsonis, K. (2009). Retinal regeneration in the *Xenopus laevis* tadpole:  
824 a new model system. *Mol Vis*, 15, 1000-1013.  
825 <https://www.ncbi.nlm.nih.gov/pubmed/19461929>
- 826 Walcott, J. C., & Provis, J. M. (2003). Muller cells express the neuronal progenitor cell marker  
827 nestin in both differentiated and undifferentiated human foetal retina. *Clin Exp Ophthalmol*,  
828 31(3), 246-249. <https://doi.org/10.1046/j.1442-9071.2003.00638.x>
- 829 Wan, J., & Goldman, D. (2016). Retina regeneration in zebrafish. *Curr Opin Genet Dev*, 40, 41-  
830 47. <https://doi.org/10.1016/j.gde.2016.05.009>
- 831 Xia, X., Teotia, P., & Ahmad, I. (2018). Lin28a regulates neurogliogenesis in mammalian retina  
832 through the Igf signaling. *Dev Biol*, 440(2), 113-128.  
833 <https://doi.org/10.1016/j.ydbio.2018.05.007>
- 834 Yoshii, C., Ueda, Y., Okamoto, M., & Araki, M. (2007). Neural retinal regeneration in the anuran  
835 amphibian *Xenopus laevis* post-metamorphosis: transdifferentiation of retinal pigmented  
836 epithelium regenerates the neural retina. *Dev Biol*, 303(1), 45-56.  
837 <https://doi.org/10.1016/j.ydbio.2006.11.024>
- 838 Young, M. D., Wakefield, M. J., Smyth, G. K., & Oshlack, A. (2010). Gene ontology analysis for  
839 RNA-seq: accounting for selection bias. *Genome Biol*, 11(2), R14.  
840 <https://doi.org/10.1186/gb-2010-11-2-r14>
- 841 Zhao, S., Rizzolo, L. J., & Barnstable, C. J. (1997). Differentiation and transdifferentiation of the  
842 retinal pigment epithelium. *Int Rev Cytol*, 171, 225-266. [https://doi.org/10.1016/s0074-7696\(08\)62589-9](https://doi.org/10.1016/s0074-7696(08)62589-9)
- 844 Zhou, M., Geathers, J. S., Grillo, S. L., Weber, S. R., Wang, W., Zhao, Y., & Sundstrom, J. M.  
845 (2020). Role of Epithelial-Mesenchymal Transition in Retinal Pigment Epithelium  
846 Dysfunction. *Front Cell Dev Biol*, 8, 501. <https://doi.org/10.3389/fcell.2020.00501>

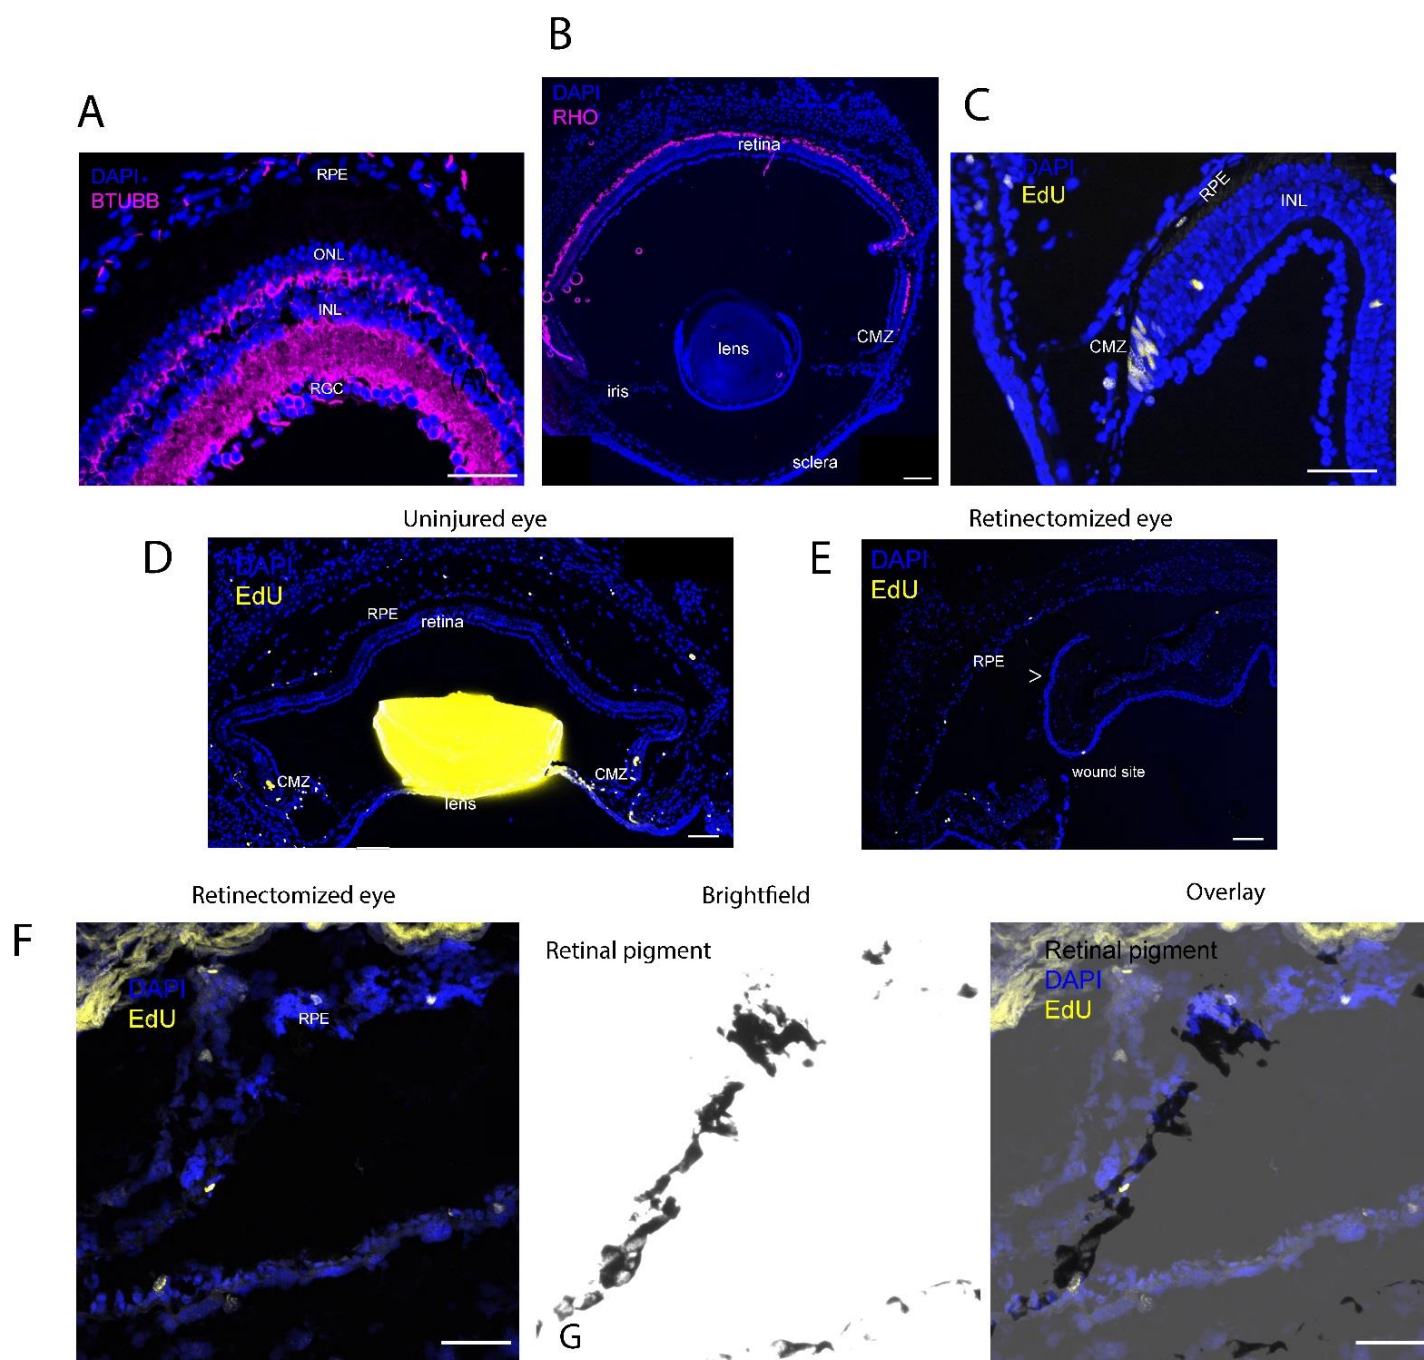

847

848 **Figure 1: Axolotl eye morphology and retinectomy.** (A) The axolotl retina contains  
849 three nuclear layers and two plexiform layers that are immunoreactive for the nerve  
850 marker BTUBB. The scale bar is 50  $\mu$ m. (B) A cross-section through the axolotl eye,

851 showing immunostaining for RHO, a photoreceptor marker. (C) EdU+ dividing cells in the  
852 homeostatic retina are found in the ciliary marginal zone (CMZ), the retinal pigment  
853 epithelium (RPE), and the inner nuclear layer (INL). (D) In an uninjured eye, the retina  
854 and the highly autofluorescent lens are present, with cells dividing in the retina and the  
855 retinal pigment epithelium (RPE). (E) A retinectomized axolotl eye at 0 dpi. The  
856 retinectomy involves a cornea cut, lentectomy, and a retinectomy, preserving the RPE  
857 with dividing EdU+ cells. The arrow indicates a scleral flap, which was left in the  
858 intravitreal cavity of the immediately collected eye, but it is straightened out in the eyes  
859 that are allowed to regenerate. (F) A zoomed-in view of a retinectomized eye. The  
860 preserved RPE layer contains EdU+ dividing cells and is discernible in the brightfield view  
861 due to its black pigment. The scale bar is 100  $\mu\text{m}$ .



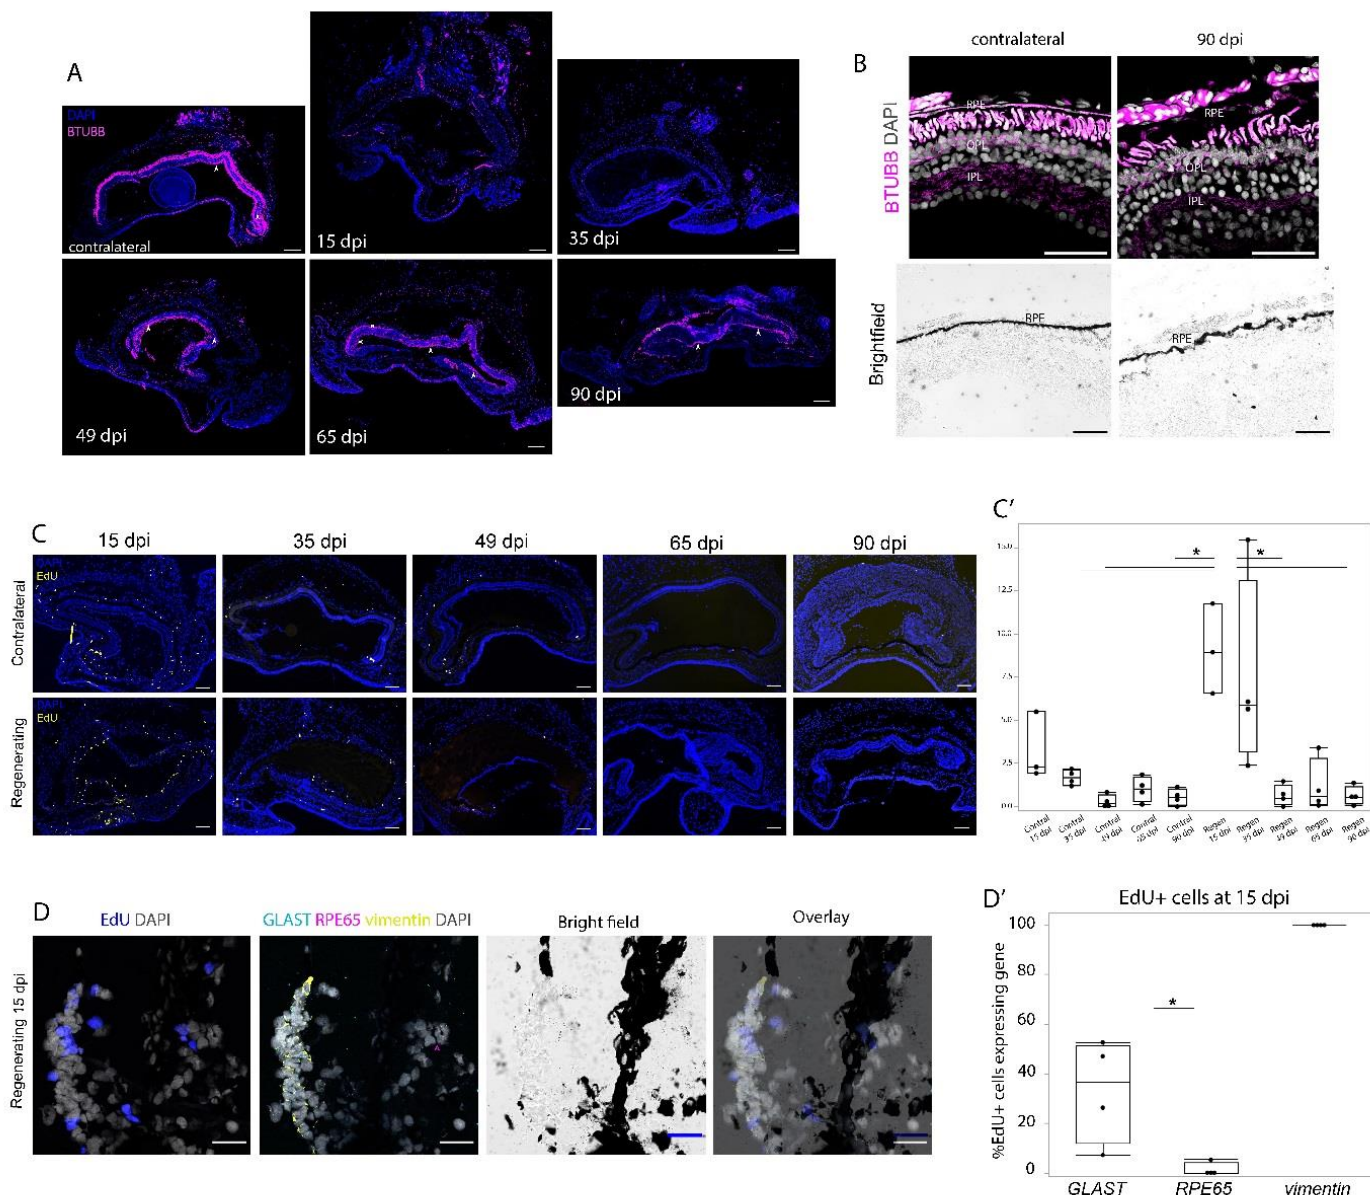

862

863 **Figure 2: The axolotl retina can regenerate after a retinectomy.** (A) Timeline of axolotl  
 864 retinal regeneration, using immunoreactivity for nerve marker BTUBB to label nerve  
 865 layers. The retinal structure regenerates within 65 days. (B) The characteristic three-layer  
 866 retinal lamination with nerve layers (BTUBB) is present both in contralateral and  
 867 regenerated (90 dpi) retinas in the outer and inner plexiform layers (OPL, IPL).  
 868 Photoreceptors, the RPE, and the choroid layer are highly autofluorescent. The BTUBB  
 869 signal is dimmer and DAPI has permeated the photoreceptor and axonal layers because

870 the pictures in (A) and (B) were taken three years apart. (C-C') EdU+ dividing cells peak  
871 at 15 dpi during retinal regeneration, both in the regenerating and contralateral eyes. (D)  
872 EdU+ dividing cells express markers of RPE and Müller glia in the regenerating 15 dpi  
873 retina, but only of RPE in the contralateral uninjured retina. Arrowheads point to EdU+  
874 cells that express either *Glast* or *Rpe65*. The scale bars are 100  $\mu\text{m}$  in A-C and 50  $\mu\text{m}$  in  
875 D.  
876

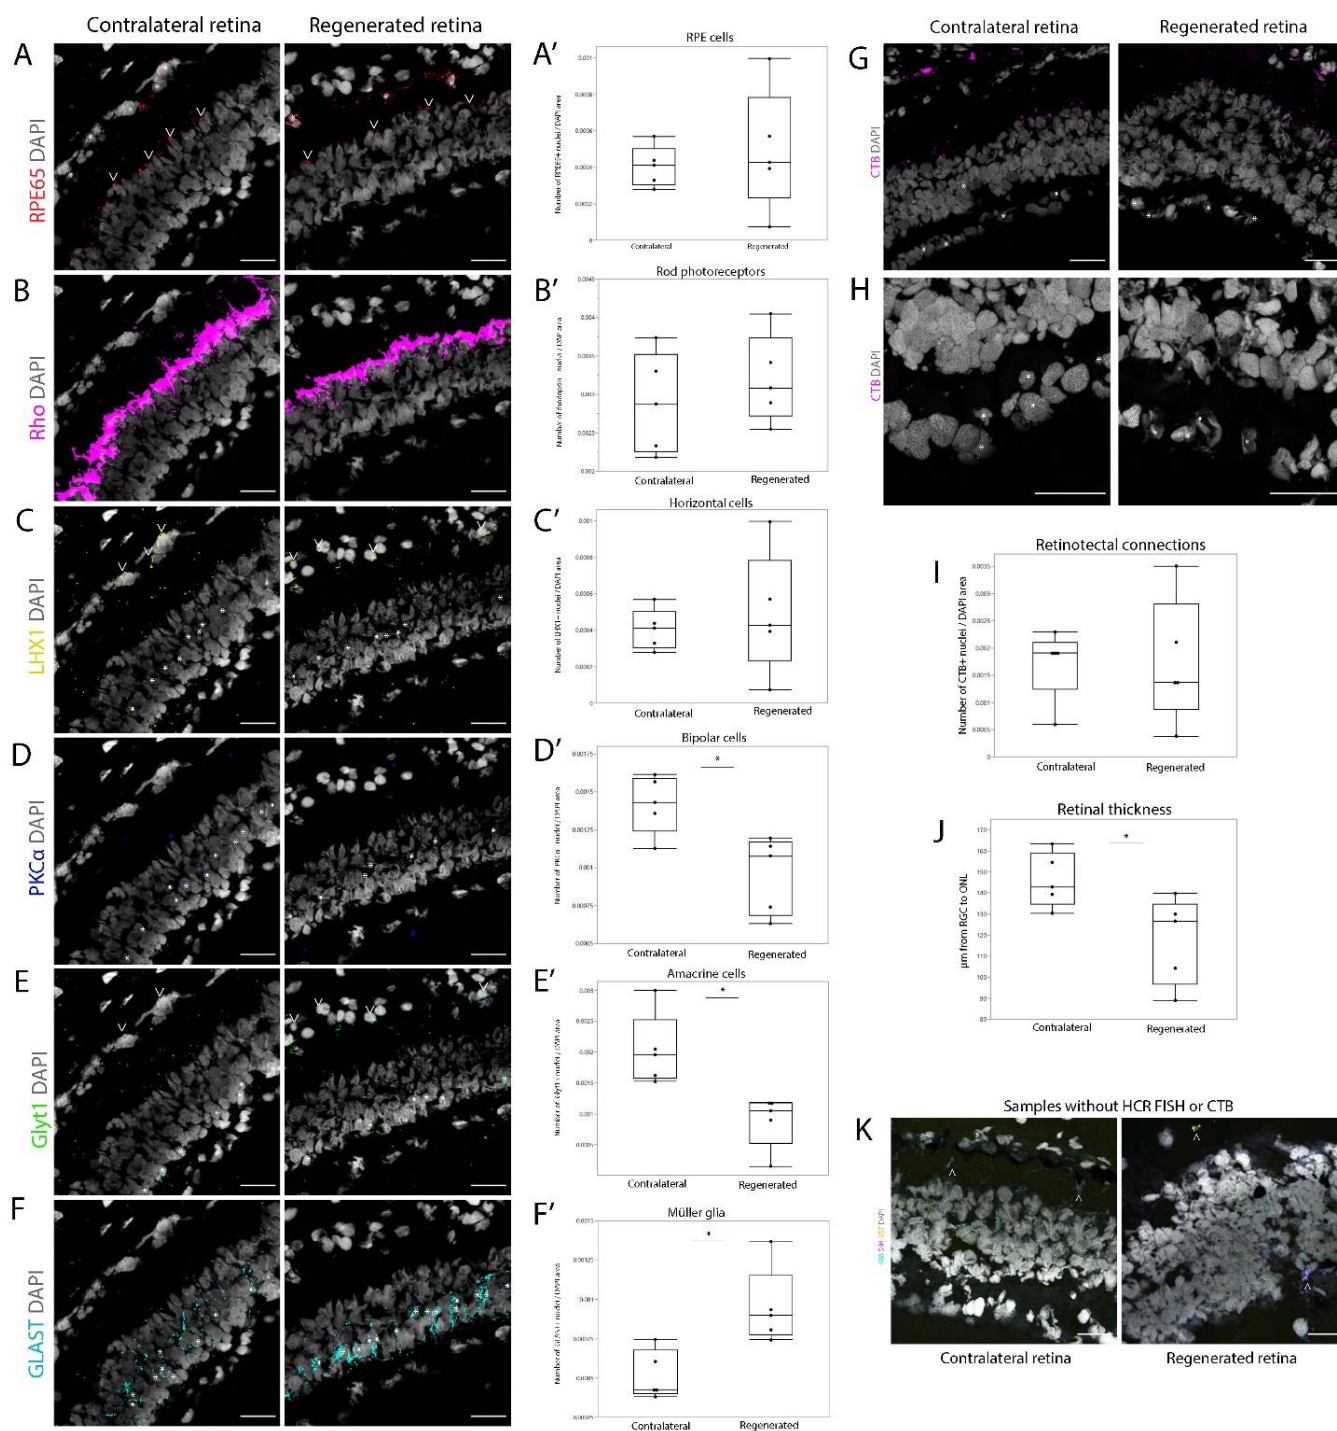

877

878 **Figure 3: Regenerated retinas (377 dpi) contain diverse cell types and reconnect**

879 **with the brain. HCR FISH images of cells expressing retinal cell type markers in**

880 regenerated and contralateral uninjured retinas, and boxplots showing quantification  
881 of those cells: (A-A') Retinal pigment epithelium (RPE) marker *RPE65*. (B-B') Rod  
882 photoreceptor marker *Rho*. (C-C') Horizontal cell marker *LHX1*. (D-D') Bipolar cell  
883 marker *Pkca*. (E-E') Amacrine cell marker *Glyt1*. (F-F') Müller glia marker *Glast*. (G-  
884 G') Abundance of RGCs expressing nerve tracer CTB at 20x magnification, at which  
885 the data was quantified. The fluorescent signal above the ONL is likely autofluorescence as  
886 the sections had not been treated for it. (H-H') Abundance of RGCs expressing nerve  
887 tracer CTB at 40x magnification for better visibility. (I) Boxplot showing retinotectal  
888 connectivity of regenerated and contralateral uninjured retinas. (J) Boxplot showing  
889 thickness of regenerated and contralateral uninjured neural retinas. (K) Negative  
890 control images of V3 HCR FISH, containing only fluorescent hairpins but no probes  
891 for detecting gene expression. Asterisks indicate cells expressing a gene, and  
892 arrowheads indicate autofluorescence. Scale bars are 50  $\mu\text{m}$ .



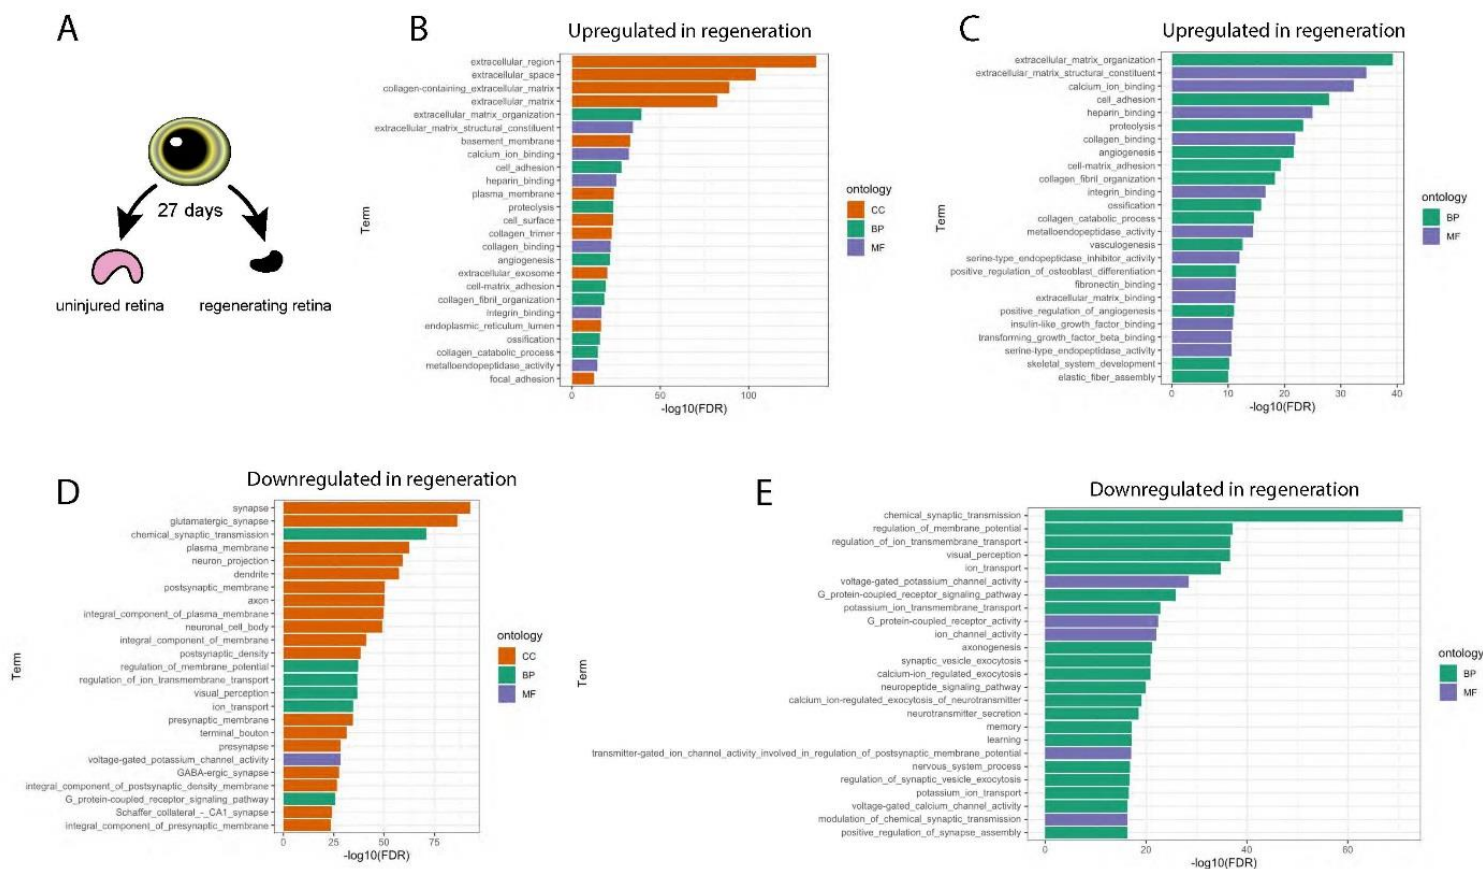

893 **Figure 4: Mechanisms of early-to-mid stage axolotl retinal regeneration.** (A)  
 894 Experimental design of the RNA-Seq analysis. We collected uninjured retinas from 12  
 895 adult axolotls and pooled them into 3 samples. We then collected the regenerating tissue  
 896 from the same retinectomized eyes at 27 dpi, matching the same animals to the 3  
 897 samples. (B) Top 25 enriched GO terms that were associated with upregulated genes in  
 898 retinal regeneration, including “molecular function” (MF), “biological process” (BP), and  
 899 “cellular component” (CC). (C) Same as in B, excluding “cellular component” category.  
 900 (D) Top 25 enriched GO terms that were associated with downregulated genes in retinal  
 901 regeneration, including “molecular function” (MF), “biological process” (BP), and “cellular  
 902 component” (CC). (E) Same as in D, excluding “cellular component” category.

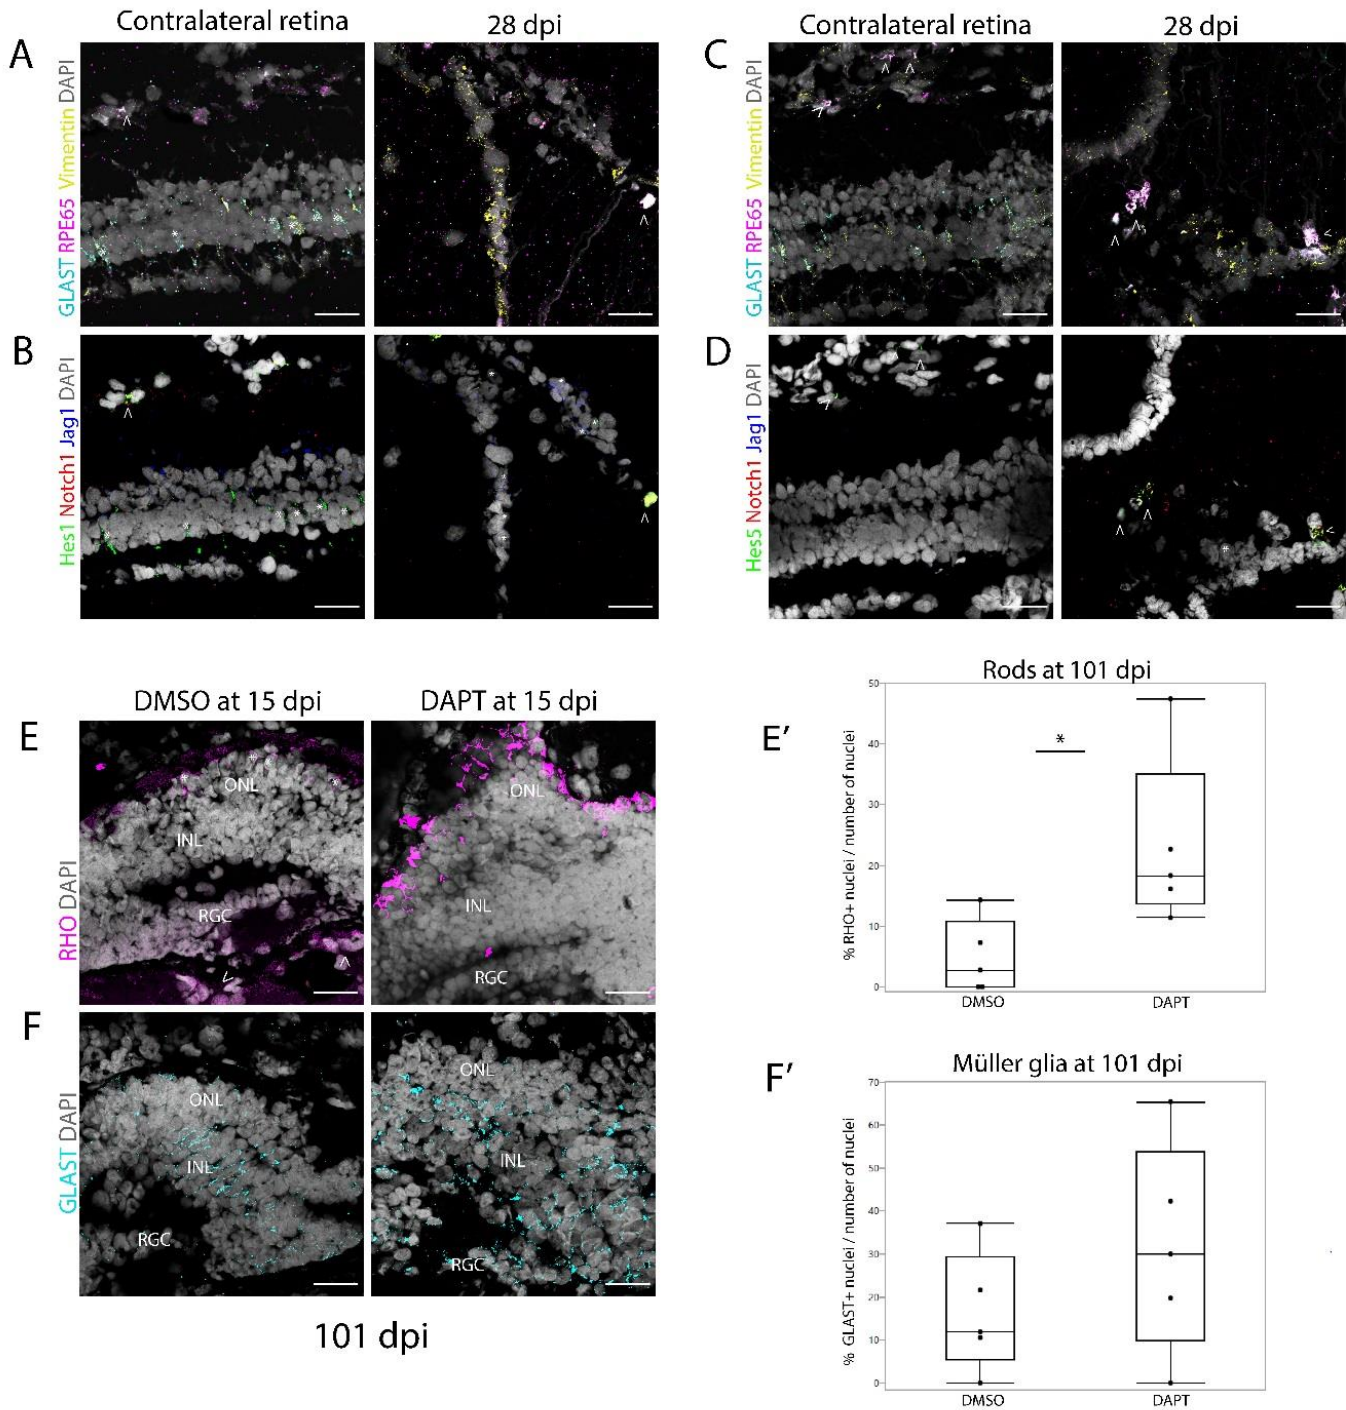

903

904 **Figure 5: Notch signaling modulates axolotl retinal regeneration.** (A, C) Expression  
905 of Müller glia marker *Glaxt*, retinal pigment epithelium (RPE) marker *RPE65*, and *Vim* in  
906 a homeostatic retina and regenerating (28 dpi) contralateral retina; (A) was then probed

907 for *Hes1* and (B) for *Hes5*. (B) Expression of *Hes1* and other Notch pathway genes,  
908 receptor *Notch1* and ligand *Jag1*, in the same retinal tissue section as in (A). *Hes1* is  
909 expressed in Müller glia in a homeostatic retina. (D) Expression of *Hes5* and other Notch  
910 pathway genes, *Notch1* and *Jag1*, in same tissue sections as (C). (E-E') Proportion of rod  
911 photoreceptors in regenerated (101 dpi) retinas after they were treated with either vehicle  
912 or Notch inhibitor DAPT at 15 dpi. (F-F') Proportion of Müller glia in regenerated (101 dpi)  
913 retinas after they were treated with either vehicle or Notch inhibitor DAPT at 15 dpi.  
914 Asterisks indicate cells expressing a gene, and arrowheads indicate autofluorescence.  
915 Scale bar is 50  $\mu\text{m}$ .
